# Supplementary material for: Positive Darwinian selection in the singularly large taste receptor gene family of an ‘ancient’ fish, Latimeria chalumnae
Source: PubMed Central journal article supplement (PMC4132921; doi:10.1186/1471-2164-15-650), 2014-08-05
Supplement: 12864_2014_6345_MOESM2_ESM.pdf [file 12864_2014_6345_MOESM2_ESM.pdf]

Additional file 2, content:

part 1: Latimeria T2R protein sequences in fasta format. Predicted stop codons in six potential pseudo genes are indicated by X (red background), sequence after frame shift (2 genes) highlighted with yellow color.

part 2: Latimeria V1R protein sequences in fasta format.

part 3: Tree file in Newick format for T2R and V1R sequences shown in Fig. 1.

part 4: Tree file in Newick format for T2R sequences shown in Fig. 2.

part 5: Tree file in Newick format for V1R sequences shown in Fig. 3.

**Part 1**      ***Latimeria T2R* protein sequences in fasta format.**

>LC\_T2R12

MVTVDIILQLAAILFVIVFGIIGNLFIIVINQELRRTGTLQPSEIRIVSCIAVSNILAVI  
VLAIWFIIIFLLDLCTYLGPYIYKVTDLIVFVITKVGWFTAWLCFFYCVKIVKINWRIFI  
KLKQGTSLLSVFLLFATVVCVSGVAYPAIYIIRTLNNTTSIVGQCKGYIILGHEFMMGYIV  
FVSFIASLLPLALMLLSSLGIVFFLLKHSKNMKTSTNSVSSPQNEGPTTVVKMVISLIVL  
YIVSVISILVTNHVATIIESDMVVIASSSCVFSAGSSVILIVGTVKLRQAFLKIFCSAG  
QCYNKCRTK

>LC\_T2R11

MVTVDIILQLAAILFVIVFGILGNLFIIVINQEFRRTGTLQPSEIRIVSCIAVSNILAVI  
VLATWFIIFLLDLCTYLGPYIYKVTDLIVFVITKAGYWFTAWLCFFYCVKIVKVNWRIFM  
KLKQGISLLVSFLLFATVLCVSGVAYPVYVIRTNLNNTTSIVGECKDYIIGHEFMMGYIV  
FLSVIASLLPLALMLLSSLGIVFFLLKHSKNMKTSTNASSGPRTEGPTAVVKMLISLIVL  
YIVSVISILVTNHVATIIESDMVVIASSSIFFSAGSSVILIVGTVKLRQAFLKIFCSAG  
QCCNK

>LC\_T2R10

MVTVDIILQLAAILFVIVIGILGNLFIIVINQEFQRTGTLHPSEIRIVSCIAVSNILAVI  
VLAIWFIIIFLLDVCTYLGPYIYKVTDLIVFVITKAGYWFTAWLCFFYCMKIVKINWRIFV  
KLKQGISSLVSFLLFATVVCVSGVTPYIYIIRTLNNTTSIVGECKDYIIGHEFMMGYTV  
FLSFASLLPLALMLLSSLGIVFFLLKHSKNMKTSSASSGPRTEGPTAVVKMLISLIVL  
YIVTVISVPVTNLVATTNESDMVVIASFSCIFSAGSSVILIVGQVKLRQAFLKIFCSVG  
QCCNKCRTK

>LC\_T2R09

MVTVDIILQLATILFVIVIGILGNLFIIVINQEFRRTGALQPSEQIVSCIAVSNILVVV  
VLAIWFIIIFLLEVCTYLGPYIYKVTDLIVFFSKAGYWFTAWLCFFYCVKIVKVNWRIFM  
KLKQGISSLVSFLLIATTVCSVSGVAYPVIDTIRTLNNTNIIGECKDYIILKHEYLVGYII  
FLSFASLLPLALMLLSSLGIVIFLKHSTNMKTSSNTSSGSRSEGPIAVVKMLISLIIL  
YLVSVISVLVTNHVASIIESDMVVIASSSCVFSAGSSVILIVGTVKLRQAFLKIFCSAG  
QCYNKCTG

>LC\_T2R07

MATVDIILQLAAILFVIVFGIIGNLFIIVINQEFWRTGTLQPSEIRIVSCISVSNILVVI  
VLAVWFVIYLLDVCTYLGAHVYKVTDLLIIFISKASYWFTAWLCFFYCMKIIVKWRFFK  
TLKQRISLVSFLLIATVLCFAVAYPVYIYIIRSLNNTNTIIGECKDYIITQHELTMGYAI  
FLSLVASLLPLALMLLSSLGIVVFLFKHFKNMKTSSNTSSSPRNEGPIVAKMLISLIVL  
YVVTVICVLVTNHVFTIVASDMVVIASSSCVFSAGSSVILIVGTVKLRQAFLKIFCSVG  
RYLQ

>LC\_T2R08

MATVAIILQLAAIMFVIFFGIIGNLFIVIVNYQKFWRTRTLQPSEQIVSCIAVSNILVVI  
VLAVWFTGFLLVCTYLGAHVYQVTDVFLVILFSKSGHWFTAWLCCFFYCVKIKVNWRFIM  
KLKQSISSLVSFLLIATVLCNFGVAYPVYIIRSLNNTNSNEECKDYHIFGHEYLVGAV  
FLSVITSLPLVLMLISSLGIVVFLKHSKNMSKTSNTTSGSRSEGPTAVAKMLVSLIIL  
YMVSVISALVTNHVATVIQSSMVVIASSVCIFSAGSSVILIVGTVKLRQAFLRLFCSSV  
RCCNKCRA

>LC\_T2R25

MATDDAITQLVVELVIMLFGLGGNSFIVCVYVMEYQRSKALLPTEVIVTILAIFNILIQ  
NLVLFVWVYLFNLCTHFGVYQVTDVFNALFLSKSSYWFATWLCFFYCVKIKVNWVLM  
RLKQKMTSVVHILILASLMLSFVAVPIIYRVKFRKNATSISELCKLYYDTGGESGYIYG  
AMMSLLTSFLPLAVMVISSMGIVIFLCRHSRNMTRKNTGGSSHTDAHTAVALMLLCLIV  
LYIICTSTVLSANLQIALSQFDVLLAISFTSSIYSAGSSVILIIIGTVKLRQSCGKLCCSG  
G

>LC\_T2R31

MVAVDAILQMLIAVIVSISFTGNSFIVHVYFLDYRRNKALKPNELIVTVLAFFNILIQF  
NLLLWFMVYLFNLCTFFGDVIYQVLDVSDIFLSESSYWFIAWLCFIYFVKIVKMKRKF  
SLKQKISLLVNILIFFSMLVNFALPVIYMIKLLKANSTLSMLCKDYYITGDTAYIYSA  
FLSFFTSFLPLVIMLMSSLGIVIFLCMHSRMTMRKNTVAGNSSHGAHTAVAMMIVCLIVL  
YMLCKITVLANIQIAMADEFDISIAIFCASSIHSAGSSVILIIIGTVKLRQSCGTLCCSQ  
VSDSNN

>LC\_T2R30

MVAVEAILQILTVVIVFISFTGNSFIVHVYFLEYRTNKVLKPNELIVTVFAFFNILIQIN  
LLLWFMVYLFNLCTFLGEVIYQVLDLSDIFLTKSSYWFIAWLCFIYFVKIVKIKRKF  
LQKQISLLVNILILCSMLVNFALPVIYMIKLLKANSTNLSMLCKDYYITGDTIHIYSAF  
LSFFTSFLPLVIMLMSSFGIVTFLCMHSRMTMRKNTVAGSSSHGDAHTVVTVMIVCLIL  
MLCTVTALANLQIAMADEFDILVAITFASSIHSAGSSVILIIIGTVKLRQSCGTLCCSQ  
SD

>LC\_T2R32

MVAVDAILQMLIAVILLISFTGNSFIVHVYFLEYRRNALKPNELIVTVLTFNLIQFN  
LLVWFMVYLFNLCTFLGDVIYQLLDFSDVFLSESSYWFIAWLCFIFVKIVKIKRKF  
LQKQISLLVNILILFTMLVNIFLALPIIYMIKLLKVNSTLSMLCKNYYITEETTHIYSAF  
LSFFTSFLPLVIMLMSSLGIVIFLCMHSRMTMRKNTVAGSSSHSDAYTAVTMIIVCLIF  
MLCTATVLTANIQVIMANFDIFVVISFISIIHSAVSSVILITGTVKLRQSCGTLCCPP  
SDSNK

>LC\_T2R26

MVTVDVILQLMAELIIMLIGLAGNSFIVHVYFVEYRRNKALXPTTELIVTILAIFNIFIQ  
NLVLFVWVYLFNFCTYFGDVIYQVTDVNSIFLKSYSYWFATWLCFFYCVKIKVNWQRCFR  
RLNQRISLVNLIISFSLISFPVAYPVYIYIKLVNNTLSMLCKDYYITGDTTHIYGA  
FLSFLTSFPLAVMLASSMGIVIVLCTHSRNMKRNAVASSSSHGDAHTTVAVMIICLILL  
YVLCITVLSANLQIALSHFNTLIGISFTSSLYSAARSVILIIIGTVKLRQSYGTLCCS

>LC\_T2R27

MVVIEIALQMLAEVITVLIALAGNLFIVYVYFLEFRKTKALQPNE LLVTVLALFNILVQF  
SLVLWFMLYL FNLCTYFGGVYKVTDFNI IFFSKSSYWFTAWLCFFYCMKI IKVKRMFFI  
RLKQRMSLLVKILILCTMMLNFSLAYPVVFLIKLKANSTSSISILCKDYYITGDTTHIYGA  
SLSFLTSLSP LAVMLVSSMGIVIFLCLHSRNMKRNAIAGNSSHGNTHTAVAVMIICLILL  
YMLCTITVLSANLQVALAQFDTLVAITFTSSLYSAGSSLILITGTVKLRQSCVTLFCSCR  
QQQ

>LC\_T2R28

MVAIDAVLQMLAEVIIVLIALGGNSFIFCVYFLDYKRNKTLQPNE LLVTVFFASFNILIQI  
TLIWFVVYLFNLCTYFGEVYKVMDFSAIFLSKSSFWFI AWLCFIYFLKIVRIKSRFFMG  
LQQKMSSLVIVLILITLLVSFSVALPVIYMIKLQTNSTSSISELCKDYYIIGKFAYIHGAF  
LSILTSFLPLVIMLISSMGIVIFLCTHSRKMKNVAVASSSSNEDAHTAVAVMIICLILLY  
VLCIITVLSGNLQIALSQVDETVIIVFMSCIYLA VSPVILII GTVKLRHSFKKLLTSFKR  
YCIKLFNV

>LC\_T2R20

MASTNVLLQLVVEFII VFFGLIGNAFIVHVNLLDYWTRSTLQPS ELTVTILALFNIFIQL  
NLTFWFIIYLFNLCA YFGDEVYKVTDFLAIFFSKASYWFTAWLCFVYCVKI IKVNWRFM  
RVKKRLNPLVNSLIIGTVLASFAMSFPIVYFIEFKTNSTSSISKCKDYYVDGMNIKIYAA  
SLSFLTSLVPLAVMVFSSMGIVIFLYQHSWNKSKNVSSGASSHGDAHTAMAVMLICLNIL  
YVACTATVLAANLIIAIVESDIMIAISFTSSIIYSAGSSIIIIIGTVKLRQSCGKISLKLL  
FCWKQRLM

>LC\_T2R21

MASTKVLQLVVEFII VFFGLVGNFIVHVNLLDYWTRSTLQPS ELIVTILALFNIFIQL  
NLTFWFIIYLFNLCA YFGDEVYKVTDFLAIFFSKASYWFTAWLCFVYCVKI IKVNWRFM  
RVKKRLNPLVNSLIIGTVLASFAMSFVVYFIEFKTNSTSSISKCKDYYVDGRNIEIYAA  
SLSFLTSLVPLAVMVFSSMGIIIFLCRHSWNMSKNVSSGASSHGDAHTAVAVMLICLIVL  
YVACTATVLAANLIIAIIESDILIAISFTSSIIYSAGSSIIIIIGTVKLRQSCRKL

>LC\_T2R22

MAATDVIVQLVVELMIILIGLVGNVFI VVVHVSEYRRTKALQPNE LIVAILAFFNILIQI  
NLLIWFVVYLLNFCIYFGDDLYKVTDFMSVFLSKSSYWFTAYLCFYCVKI IKVNWSCFN  
SLKQKISSVVKTLITCTLLGTIALSAPVVYYVKLNTNLSSISEICKVYYIDAHNEVYAAF  
LSVLTSLPLAVMFISSGTIVVFLCRHSRNMTKNVTPGGTHNDAHTAVAIMLTCLIVLYI  
ACTVTVFAANLLVVTIESDVLVAISFTSSIIYSAGSSVILII GTVKLRKNWVKLCCGGVI  
LQ

>LC\_T2R24

MVVDIIILQFVAELFILFFGFLGNFFIVHVYFLEYRKNRALQPTEVMVTFLALFNILIHV  
NLVIWFVVYLFNL CIYFDKAFYKVTDVIAIFLSKSSYWFTAWLCFFYCVKIVKVNKLFV  
WLKQRISRNVNTLIIGTMFFSIIISYPCIIYVIEIKTNVTSITQRCKDYYITGQSIEIYSP  
SLSFLGSLPLALMVMSSMGIVIFLFRHSRNMNTANTTTGSASRNDAAHTTVAIMLICLIVL  
YLACTVTVFVANI IAMIANDILIAISFTSSLYATGSSLILII GTVKLRQSCSKLSCLCR  
RCNSKNPQH

>LC\_T2R23

MVTVVIVQLLVEFIIMMLGLLGNVFIVVYVFQYKKSKELOPNELLVAFLAFFNVLIQIN  
LGLWFVVYLFNFCLYLGFTDLIALFITNSNYWFIAWLCCFFYCVKIIKVNLIILFTRLQRR  
PMVVNIIIGTLIGCFPISVPAIHVYKFKTNFTSVSDLCRDYYPHSGNEVYAVLLSVLTS  
FLPLVIMVICIMTIVIFLCIHSKNMSKNVTLGGSSHGDAHITVAIMLICLIVFYIACAT  
VFAANLLVVLVDGYVLIAISYTSIFSTGSAVILISGTVKQHFVKICCLRQ

>LC\_T2R06

MAGADIIVQVAVVMITMFLVGNFIVLVNLQEFRRSKALQPSEIVTSLALSNGINEI  
SQVIWFAVYLMNLCVTRDDGYKVLDFLAVFISTANYWFTAWLCCFFYCVKIVKVNKWSFM  
RLKQKISSLVSFLLIGTVLGSFAMSFPIVYIKIKANTTSLNEKCKDYIIIGNSYHIYSA  
FLSFLTCFLPLALMLVSSGTIVVFLCQHSKRMNKSAGAGDGTSPDSHTTVAKMIVSLIVL  
YMACVASVLAANHIFTVIESDILVVIASFVSSAGSSAILILGTVKLRQSCSKLGCAGM

>LC\_T2R13

MAATDDVLQLVAGFILVFLALLGNFFTVLMNLLFEFKRSRSLQPNELIMLSLTLNGLAVI  
SYGIWVVIYLMNFCPYFGDTGYQVLDLFLSLFLTKTSYWFTAWICCYCVKVVVKVWRFFM  
RLKQRIHKGVNTLIVGTVLGNFVICLPVFNKIKTNSTNLKEQCRDYVVLGSSTYIYHAT  
TSLSVLTSFLPLVLMLSSTGIVVFLCKHSRTMNKNSSSGATSHSDAPTAVAKMIVALIIL  
YIICTGTVFALSFIIVTMVESDTLIVISYMDCLYSAGSSITLIVGTVKLRQSCRRLCCSSQ  
LQDY

>LC\_T2R05

MAPFAAITQLVMELIIVWIGLAGNLYIMAIYVLEFRKNRTLHPSEIIMTCLASSNTFNEI  
SQLVWFLVYLFSLCRHFGDDIYKVLDFLAVFLSAINYWFTAWLSFFYCVKIVKSKWKLFM  
RLKQSSSSWVAPVITGTALGCCTISFFIVFYIQIPTNTTNETEPCKDYIIISSDYIIYSA  
FYSLLGCFLPLALMAVSSSVIVAFCKHAKRMRKTTSGASTPQSGTHTAVAKTIFGLIVL  
YTSCVVSVLAADHVSILIESDVLIVLAYASSIYSAGSSIILTIGTVKLRRSIRRNCCLKP  
SKQRNEVQ

>LC\_T2R18

RFELTEEQMANMFLILQLVAVFIVVSLSLGSSFFIVFANLIKQSSGVLQTDGLIITCLA  
LSNRLTDVGVQVPWFLVYILNLCNNTGEDLYKATDFFITFFNKSSWFAAWLCLIVYCVKIV  
KVNWRFTFLKLDRISSVVKVLIAVTMVGLALSLPIIFFIQLOQSNNTSISAQCKNYINE  
NSFYVYAAFLSFFTSFLPLAIMLASSMTIVTFLCKHSRKMTNNYNAISGSHGDGPAAVAK  
MITSLIVLYILCTGTVFALNNLVVLEGNVLFVIALSCSMYSAGCAMILSINQ SINLYL

>LC\_T2R19

MANMFLILQLVAVFTVVSLSLGSSFFIVFANLIEFQSSRVLQTDGLIITCLALSNGLTDV  
GQVPWFLVYILNLCNNTGEDLYKATDFFITFYNKASSWFTAWLCLFYCVKIVKVNWRFTL  
KLKRRISSVVKVLIAVTLVGLALSLPIIFFIQLOQSNNTSSISAQCKNYINENSFYVYAA  
FLSFFTSFLPLAIMLASSMTIVTFLCKHSRKMNKSTNAISGSRGDGPAAVAKMITSLIVL  
YVLCGTGFALNSLVVLEGNVLFVIALSCSVYSAGCAMILIIGTVKLEKCKGVCCRGNR  
TEKPKHAVTAASVNR

>LC\_T2R16

MANTFLILQLVAIFTVVSLSLGSSFFIVFANLIEFRSSGVLQIGDLIITCLALSNGLTDV  
VQVPWFLVYILNLCNNTGEDLYKATDFFFIFFNKASSWFTAWLCLFYCVKIVKVNWRFTL

KLKRRISSVVKVLI VAVTLVGLALSPLI IFFIQLQSN TTSI SAQCKNYYINENNIHVYGA  
FLSFFTSFLPLAIMLASSMMIVTFLCKHSRKMKNKNTNSISVPLRNGPVAVAKVITSLIVL  
YVLCGTGVFALNSLVVLEGNVMVFISLSCSVYSAGCSMILIIIGTVKLRKCRGVCCRGNR  
TEKPKH

>LC\_T2R17

MANTFLILQLVAVFTVVSLSLG SFFIVFANLMEFRSSGVLQTDLIITCLALSNGLTDV  
GQVPWFLVYILNLCNNTGEDLYKATDFLNTFFNKASSWFTAWLCLFYCVKIVKVNWRFTL  
KLKRRISSVVKVLI VVTLVGLALSPLI IFFIQLQSNITSISAQCKNYYINENNSHVYAS  
FLSFFTSFLPLAIMLVSCMMIVTFLCKHSRKMSKNTNSISGPLRNGPVAVAKMITSLIVL  
YVLCGTGVFALNSLVVLEGNVMVFISLSCSVYSAGCSMILIIIGTVKLRKCRGVCCRGNR  
TEKPKHS

>LC\_T2R14

MANVFLILQLVAVFTVVSLSLG SFFIVFANLIEFRSRGVLQTDLIITCLALSNGLIEV  
GQVPWFLVYILNLCNNTGEDFYKATDFMSTFFNKASSWFTAWLCLFYCVKIKVNWRTFL  
KLKRRISSVVKVLI VVTLVGLVVLPI IFYIQLQSN TTSI SAQCKNYYITENNIHVYGA  
SLSFFTSFLPLAIMLASSMMIVTFLCKHSRKMSKNTNAVSGSRGDGPAAVAKTITSLTVL  
YVVC GTGVFAL TSLVVLKDNVLFIALSCSVYSAGCSMILIVRTVKLKVRCRGLCCRDNR  
TEKPKH

>LC\_T2R15

MANVFLILQLVAVLTVVSLSLG SFFIVFANLIEFRSSGVLQTSDLIITCLALSNGLIEV  
GQVPWFLVYILNLCNNTGEDFYKATDFLNTFFNKASSWFMAWLCLFYCVKIKVNWRTFL  
KLKRRISSVVKVLI VVTLVGLVVLPI IFYIQLQSN TTSI SAQCKNYYITENNIHVYGA  
FLSFFTSFLPLAIMLASSMMIVTFLCKHSRKMSKNTKAVSRSHGDGPAAVAKTITSLTVL  
YVVC GTGVFAL NSLVVLEDNVLFIALSCSVYSAGCSMILIVKTVKLERCREVCCRGNR  
TEKPKH

>LC\_T2R34

MAITKVIAELISRLTIIFVGLLGNFFILHIYFLEYRKNKVLHPTLITLLAFFNLLSSA  
ALVLPNRLTLLFCSYFQEPIYKFSDFSTFFSKSTYWF TACL CFYCYCMKIVKVNKRFFLT  
LKQRISIVSVLLSSFLLCFAVSFPVVYFIQLKPNSSIPCKTHYTLGKALFIYNI FNVA  
LAYYLPLVMMTCSLGI VIFLCRHSRNM DKNIAAGGSSHSDAHKPVAVMLICLILLYMTC  
ALTVLLASVQASLGEIDIMTAIPYTASLFNTGSSMILIVGTVKLRQSFRTLWCFCR

>LC\_T2R35

MAATKVIVELIIRSTIIFVGLLGNFFILHIYFLEYRKKKVLQPNELITLLALFNLLSSV  
ALVLPVAVRTLLFCRYFADPIYKFSDFSTFFSKSTYWFVACL CFYCYCMKIVKVNWRFLLR  
LKQRMSTVMNVLLSSFLLCFAVSVPVAHFIKLKPNS SIPCKTYTLGKALFIYNI FNVV  
LAYYLPLVVMVICSLGI VVFLCHHSRNM DKNVAAGGSSHSEAHKAVAIMLICLILLYMTC  
ALTVLLASVQTSLGEIDIMTAIPYTASIFSTGSSMILIIIGTVKLRQNFRL

>LC\_T2R36

MATTKSLVDLVVRLTIIFVGLVGNF ILHVYSLEYRKSKNLQPNELITALLALFNLLSSA  
NLVITTVRTLLFCSYFQEA VYKFTDSFSNFTSKSTYWF TACL CFYCYCMKIVKVNWRFFLR  
LKQKISLVVNILLSTLILCFTISIP IYLIKLPNSSVPCKTHFILGRTLFIYGIINGV

LTSYLP L L L M V I C S L G I V I F L C Q H S R N M D K N V A A S G T S H S E A H K A V A I M L I S L I L L Y M T C  
A I T V L L A S V Q L T L G E I N I M T A I P Y T A S I F S T G S S V I L I I G T V K L R Q S F K K S L F F L K T F L Y  
E S C P F

>LC\_T2R37

M P S T S V I V E L V V R L T I I C V G L V G N T F I L H A Y F V E Y R N R K V L Q P N E L I T T L L A L F N L L A T A  
N L V L P N L R T L L F C S Y F G E A I Y K F T D S F S N F V S K S T Y W F T A W L C F Y C V K I V K V N G R F F L R  
L K Q R I S L V V N I L L L S T I T L C F T I S I P I L Y L I K L K L N S S V P C K T H F I L G R T L F I Y G I V N G V  
L T S Y L P L V M V I C S L G I V I F L C Q H S R N M D K S I A A G G T S H S E A H K T V A I M L I C L I L L Y M T C  
A I T V L L A S I Q L T L G E I N I M T A I P Y T A S I F S T G S S V I L I I G T V K L R Q S F K K L W C F C G

>LC\_T2R33

M K T T K E I M D L I V R M T I M S L G I I G N F L I L H V Y F L E Y R K S K V L Q P N E L I T A L L S F F N L L S S A  
A H V L P A L R T L V F C T Y F K E P V Y K F S D F F S F F F S K L T Y W Y V A W L C F F Y C V K I V K V N W K F V L R  
L K Q R I S I V V N I L L L G S L I L C F A L S M P L P Y L I K L K A N S S V P C R N F Y I V G K A L F I Y G V I I A A  
L T A Y F P L L I M V I S S L G I V I F L C Q H S R N M D K N V A A G G S S H S E A H K A V A I M L I C L I L L Y M T C  
A L T V L L S S V Q V S L G L N D I M T A I P Y T A T L F S T G S S V I L I I G T V K L R Q S I K R I L C S R C

>LC\_T2R39

M A T A G T I V E V T L R L V M I L F S I L W N L F I V R V Y F L E Y R I N K A L Q P T E L I V T L L A L F N V C L P V  
C L V I P V L R L N F F C R Y F G E E V V K L I E V V I I F I S K S S Y W F T A W L C F F Y C M K I V K F N W R F L L R  
L K Q K I S S M V K G L I V F T L M F C F S L S V P I I S I I K L K T N S S Y T P K E C Q S I F G R G K S T I I Y G V I  
F T V F T S L L P L A I M V V S S L T I V I F L C R H S R N L T K N V S T N G S S H S D A H T A V A I M L V C L I V L Y  
I A C T S T V M A A N L Q A S L G N I D L F V G I S V S S Y L Y S G S A V L L V I G T V K L R Q S F K K L

>LC\_T2R38

M G T T E S I V E V T V R L V I I F F G I I G N L F I M G V Y L L K Y R R S K A L Q P T E L I V T I L A F F N V L I P I  
N L V L P M I R G Y F L C N Y F G E A S Y K L V D V I V I F V S K A S Y W F L A W L C F F Y C V Q I I K V N W K L F L D  
L K R K I S S V V K V L V F F T L L F C I L M S I P V I S I I Q I Q R N S S Q V L G H C K N F Y M K G N N V F I Y G V V  
L T A L T S L L P L V I M V V S S L S I V I F L C K H S R N M T R N V S T G G S S H S N A H T A V A I M L I C L I I L F  
I V C T F T V I F A N L Q V S S G E F N I L A A I S I T S S L Y S A G S A V I L V I G T V K L R K S F K K L

>LC\_T2R40

M V T T D A I P E L A V R L T L I F F G I I G N L L I V R V Y F L E Y R I S K A L Q P T E L V V T I L A S I N V L Q P I  
S L F L P I I R L Q F F C R Y I G E G M V K L I D I I L I F F S K M S Y W F T A W L C F F Y Y V Q I V K V N W K V F L R  
L K Q R I S L V V K F L I I C T L I V C F I L S V P V I R I I K F T P N D S Y I P K Q C Q N I Y I R G K A T F I Y T V V  
L T V L T S L L P L A V M V V S S L N I V I F L C R H S R N M T K N V T T I G S S H S N A Y T T I A I M L I S L I I L Y  
V V C T S T V V A V N L Q V S V G D L D I L T A I A I T S S F Y S A G S A V I L S I G T L K I R Q H C I K V C C I K W G  
S M L R D Q H I

>LC\_T2R65

M A D N D I V H L C V A M I L V V F G C L G N M F I L L V Y F L E Y R R G Q T L Q P Y E V I V T L L S V C C I M I E L C  
H V V W F P V Y L L N F C T N I G D I V Y K V T D F I N I F L S K T I I W L T A W L C F V Y C V K I I K V N Q K I F I R  
L K K R I S L S I R Y M I A G T V L L C I L L S F P I I L F I K L K I N S T N I C R D Y Y S V N E K K E L S L I Y S S M  
L T F L T S F L P L V L M L V S S L S I V I F L C Q H S R N M D K N V A S S T S H S D A H T S V A I M L I C L I A L F  
I A C A G T A L S V N I Q V A T G Q F D A L E A I T L T D I I Y S S G S P M I L I I G M V K L R N S F V N L L C P M R R  
R

>LC\_T2R67

EMAANDIVHLCVAMILVGFGLGNMFILLVFLKEYRRSKTLQPSEVIVTLMSVCCIVTEL  
CYALWFPVYMLNFCSYFGDTVYKVTDFINIFLPKTITWLTAWLCFVYCVKIIKVNWRFFM  
RLKQRISLVRYMIVGTLLLCILLGFPIILLIELKVNTTNICRDYYSVNEKKELSLIFSS  
MLSVLTSFLPLVLMVSSLSIVIFLCRHSRNMKNMASSRTSHSDAHTSVAIMLICLIAL  
FVACAGTVLSVDIQVASGQFDVKAVITLVDIIYSSGSPVILIIIGMVKLRNSFVNIFKTSI  
KTINREGLS

>LC\_T2R66

MAANDIVHLCVAMILVGFSLGNMFIILVFLLEYRRGQTLQPYEVIVILMSVCCIVTDL  
YAVWFPVYLLNICTFFGDTVYKVLDFINTFLPKTLIWLTAWLCFVYCVKIIKVNWRIFMR  
LKQRISLAVRYMIVGTLLLCITLLGFPIILFFIKLKNSTNICRDYYSVNEKKELSLMYSSM  
LSVLTSFLPLVLMVSSLSIVIFLQHSRIMKNVASGSNSHSDAHTSVAIMLLCLIVLF  
IACAGTVFSVNIQIATGQFDVLFATLADIIYSSVSPLILIIIGMVKLRNSFVKLLCPLRR  
K

>LC\_T2R70

MAVTDIVQLGAAIIIGFGYLGNVFIVLVFLLEYRRNQTLQPHLIVAFMAICNVGTELG  
FVVFFVLYLLNCTYAGETVYEVVHFFTVFLPKTVIWLTAWLCFVYCVKIVKNWRIFMR  
MKQRLFFAVKCMIVGSLLLCTLVSFPVSLLIKFKINSTKICRDYYSDEEKELFFLFTSI  
LSLSTSLPLILMLVSNLGIIVIFLCLHSRAMEKNVSSSGTSHNNAHTSVAIMLLCLIALF  
IACAGTALSVNLQIASGQFDVQIAIALSTVIYSSGSPVILLIGTVKLRNSFIIILLCPHQR  
N

>LC\_T2R71

YIIDSIIYLGAAMIIIGFGYLGNAFIIILVFLLEYRRSHTLQPHLIVSFMSICNVGTELG  
GFVFFVLYLLNFCTYVGETFYEVVHFFTVFLPKTVIWLTAWLCFVYCMKIIKVNWRIFM  
RLKQKISLAVNCMIVGTLLLCITLVSPFIALFIKFKINSTNICRDYITDDEDKEFFFIYAS  
SLSLTSLPLILMLVSSLGIVIFLCLHSRKMDKNITTNSTSRNDAHTSVAIMLLCLITL  
FIACAGTALSVNLQIATGQFDIQIAIALSTVIYSAGSPMILIIIGTVKLRNNFTKLLCPNQ  
RKISICIFF

>LC\_T2R74

MADADIVQLTAAMIIIGFGCIWNVFDLVFLLEYRRSRTLQPYELIVTLMAIGNIGTEVG  
YVIFVLYLLDLCTYAGETVYKVLQFFTLFCPKIWIWLTAWLCFAYCMKIVKLNWKIFMR  
LKLNLAVNCMIIGTLLLCFLVSFPVFFIKFKMNSTNVCRDYITVEEKREWSFIYTSL  
LSFFTSFLPLILMIVSSLGIVIFLCLHSRHMKNITSSGSSHSDAHTSVAIMLLCLIALF  
VVCTGTALSINLQIASGQFDVQVAIALSTVIYSSGSPVILLIGTVKLRNSFFKILCPK

>LC\_T2R73

QMVDADIVQLTVAMIIIGFGCIWNVFDLVFLLEYRRSQTLQPYELIVSLMAVSNIGTEV  
GYVIFVLYLLDLCTYAGETVYKVLHIFTLFFPKTVIWLTAWLCFAYCVKILKNWVFM  
RLKLRLSLAVNYMIGTLLLCILMSFPVFFIKFKINSTNICRDYITFEKKELSFMYSSL  
LSFFTSFLPLILMLVSSLGIVIFLCLHSRNMKNITSSSSSHSDAHKSVAIMLLCLIALF

IACAGTALSVNLQLATGQFDVQVAIALSTVIYSSGSPVILLIGTVKLRNSFFKFFCPKQR  
N

>LC\_T2R75

EMADVDIVQLWIAMI IIVFGCLGNTF IILVFSLEYRTSWTLQPYELIVMLMAVCNLMEL  
GYTAFILYLLDLCTYTGETVYKIIHFFTIPLPKTVIWLTAACLCFAYCVKIVKVNCRIFM  
RLKQRLSLAVNCMMIGTLLLTILLSFPVILFIKFKMNSTKICRDYTVNEEKELIFIYTS  
LLSFLTSFLPLVLMVSSLGIVIFLCQHRSYMDKNITPTSTSRSDAHSSVAIMLLCLIAL  
FIACAGTALSVNLQIASGQFDVQVAIALSTIIYSSGSPVILLIGTVKLRNSFSKLLSPNK  
RNQ

>LC\_T2R76

MADADIVQLGVAMI IIVFGCLGNMFITLVFSLEYRRSQTLQPYELIVMLMAVCNLGTELG  
YAAFFILYLLDLCTYTGETVYKIIHFFNIFLPKTVIWLTAWLCFVYCMKIVKVNWKIFLR  
LKQKLSLVVYCMIGTLLLTILLSFPVVLFIKLVNSTNICRDYTVNEEKELTFIYTSL  
LSFLTSFLPLVLMVSSLGIIIFLCQHTRHMGNVTPSTSHSDAHTSVAIMLLCLIALF  
IACAGTALSVNLQIATGQFDVQVAIALSTIIYSSGSPVILLIGTVKLRNNSKLLCPNQK  
LLNYMKRL

>LC\_T2R68

MVTTDIVQLGVAMI IIGICCLGNAF IILVFLLEYRRSQTLQPYELIVTLMAVSNIGTELD  
FVVWFVYLLHFCTYIGETGYKVTHFFTLFLPKTVIWLTAWLCFVYCVKIVKVNWRIFMR  
LKMRLSLAVKCMIGTLLLCILLSFPVVFLLKLVNSTTICRDYTVDEEKELSFYIYTSL  
LSFFTSFSPLVLMVSSLGIVIFLCLHSRNMNTNVTSGTSHSDAHTSVAIMLLCLIALF  
VGCAGIALSVNLQIASGQFDVEIVIALSNIIYSSGSPLILLIGMVKLRKSFTKLLCPNQR  
NLSLE

>LC\_T2R69

MASTDIVQLGVAMI IIGIGCLGNAF IILVFLLEYRRSQTLQPYEHIITLMAVSNIGTELD  
FVVWFIVYLLHFCTYIGETGYKVTHFFTLFLPKTVIWLTAWLCFVYCVKIVKVNWRIFMR  
LKMRLSLVVKFMIIGTLLLCILLSFPVVFLLKLVNSTTICRDYFTVEEKKEWSFVYIYTSL  
LSFFTSFSPLVLMVSSLGIVIFLCLHSRNMNTNVTSGTSHSDAHTSVAIMLLCLIALF  
VACAGTALSVNLQIASGQFDVEIVIALSNIIYSSGSPLILLIGMVKLRNSFTKLVCSNQR  
NLLLE

>LC\_T2R77

EMGTADVQLGVAMILVGLSCLGNTFIMLVFLMEYRRSRTLQPYELIVTLMAACSIVTVL  
AHVVWYIMYLFNFCTYFGSNIYRVTDFINVLLPKTI IWLTAWLCFVYCIKIVKVNWRIFM  
RMKKRISLAVKCMITGTLCCISLSFPSTLFIELKINSTNVCKNYYKADTKNELFFIFTS  
MLSLMMSFLPLVLMVSSLGIVIFLCLHSRNMKNITSSGTSSDAHTSVAIMLLCLIAL  
FIACAGTVLPVNIQIAFGQFDVLI AIALSNIIYSAGSSVILIIIGTVKLRHTLFLKLLCQ

>LC\_T2R78

EMGAADVQLGVAMILVGIGCLGNTFIVLVFLLEYRKSQTLQPYELIVTLMAACSVVTVL  
VWVVMYLFNFCTYFGSNIYRVTDFINVLLPKTI IWLTAWLCFVYCIKIVKVNWRIFMNMK  
KRISLAVKCMIAGTLLLCILLSFPSTLLIELKINSTNVCKNYYKADAKHELFLIFSSMLS  
LLTSFLPLVLMVSSLGIVIFLCLHSRNMGNITSSGTSRSDAHTSIAIMLLCLISLFIA

CAGIVLCVNLQITSGQYDLLVAIALSNIIYSAGSSVILIIIGTVKPRHTLVKLLCQ

>LC\_T2R79

GMATADLVQLGIAMFIIIVIGCLGNAYIVLVFLLLEYRRSQTLQPYEVIVTLMAACSIVTEL  
VSAIWYVVYLLNFCTYFGNPIYKITDFIDIYLPKTIIWLTAWLCFVYCVKIVKVNWRFFM  
RLKQRLSLAVKCMIAGTLLLCILLAFPCTLFIRLKLNTTSVCQDYRADEGKEVFFIYTS  
MLSFLTSLPLILMLFSSLGIVTFCLHSRNMDKNVTSSSTSRI DAHTSVAIMLLCLIAL  
FIACASTALSVNLQVASGQFDVLIAILYTNI IYSSGSPVILVIGTVKLRNIVVKLLCRKQ  
G

>LC\_T2R72

MADV DIVQLWIAMI IIVFGCLGNTFIIILVFSLEYRRSWTLX PYELIVTLMAVYNLDAEFG  
YMAFFVLYLLDLCTYTGTVYKIIITVFTVFLPKTVIWLTAWLCFAYCMKIVKWKIFMR  
LKLNL SLAVNCMIIGTLLCFLLSFPVVFVFKFKMSCTNICRDYYTDEEKKELSFICTSL  
SFFTSFLPLILMIVSSLGIMIFLCLHSRHMMDKNITSSGSSHTDAHTSVTIMLLCLIAFFV  
VCAGTALSVNFQLASGQFDVQVAIALSTVIYSSGSPVILLNGTVKLRDSFFFKFLCPKQR  
N

>LC\_T2R57

MEANDIMQMSVSIFILWFGYLGNMFIILVFFLEYRRSRTLQPYELIIMLLALCSMFTEMS  
TIIWLIVYFLDLCTYVGEMLYYINDTLITFFPKTAIWFTA WLCFIYCMKIVKLDWKIFMR  
LKQKISLAVRFMITWSVLLCAFISIPVSFQIEFTP NITKMCRLYYKSSGQIKFRLIYSSI  
LTLTSLPLPLMLVSCLGIVIFLCRHSRNMDKNIPSGTSRNKAHTSVAIMLICLIVLF  
VACAGTALSVNTLVASGEFDLAVAIILTQLIYSAGSPVILIIIGTVKLRKSFGMLCPSKG

>LC\_T2R54

MGASDIMQMSVSMVILWFGFLGNTFIIILVFFLEYRRRRTL RPYELIVTLLALCNIFTELS  
TVIWLIVYFLDLCTYVGEMLYYINDTLITFFPKTAIWFTA WLCFIYCVKIIKVDWKFMR  
LKQRISLAVNYMITGSVLLCLLSIPVSFQIEFTPNTTKMCRLYYKPTDDKELRLIYASI  
LSFLTSLPLVLM LASSIGIVIFLCRHSRNMDKNVTPKSSSHSEAHTSVAIMLLCLIAFY  
IACAGTALSANLKI VSGEFDLAVAIILTQLIYSAGSPVILIIIGTVKLRNSFGKLCFSKR

>LC\_T2R56

YYKIVFAFSWGTNLILQFGFFGNMFIILEYFLEYRRRQTLQSYELIVMLLAFCSIITEL  
STVIWCFVYFLDLCTNVGEMLYFVNDSIITFFPKSAIWFTA WLCFVYCVKIVKVNWRFFL  
RLKQRISLLVKFMIAWTLLLCFSISIPVSFQIEFTP NITQMCRLYYKSSGKIESRLIYSS  
FLSMSTSLPLVLM L FSSLGIVIFLCRHSRNMDKNINSSSSSRNEAHVSVAIMLLCLIAL  
FVACAGTALSANLQIATGEFDLAVAIILTQLIYSAGSPVILITGTVKLRNGFEKRF

>LC\_T2R52

VMAPGDIAQLSVAMAILWFGCLGNTFIIILVYFLEYRGRKRTLQPYEVIVTLLALCSILSEL  
DTAVWLLVYFLNLCSYVGEVLYKVTDTLITFFPKSVYWLTA WLCFIYCVIIIRVNWRFFL  
RLKQKISLVVNFMI LGTLLCLSLPVISRIKFRHNSTNMCRQYYIAMDQKEISLLYTS  
ILTLTSLPLVLM L VSSFGTVIFLCQHSRNMDKNITPTNISHSEAHTSVAIMLICLIAL  
FVVCAGTALTINLQVASGQFDLAVAVILTQLIYSAGSPVILVIGTVKLRKYFKKLC SLKS  
YCKLHSNTS

>LC\_T2R53

MAADDIAQLSVAMAILWFGCLGNTFIIILVYFLEYRGKRTLQPYEVIVTLLALCSILSELV  
TIVWLLVYFLNLCSYVGEVLYKVTDTLITFFPKSVYWLTAWLCFYCVIIIRVNWRFLLR  
LKQKISLVVNFMMGTLLCLSLPVISRIKFRPNSTNMCRQYYIAMDQKEISLLYTSI  
LTLTSLFPLVLMVSSLGTVIFLCQHSRNMKNITPTNISHSEAHTSVAIMLICLIALF  
VVCAGTALTINLQVASGQFDLAVATILTQLIYSAGSPVILVIGTVKLRKYFKKLCSL

>LC\_T2R43

MIIFGLGCLGNTFIIILVFLLEYRRNGMLQPYGLIITLLAVCSSISELAHFTKTVIYVLDL  
CAHFLEAVFKLVDFTLVFFSKSSYWLTAWLCFVYCVKIVKIKWRFFMRLKLRIPLVNFL  
IIGTALLCFSISLPVIYRIKFRNTSTYMCKYYYIPMNQKEISLLYTGMLSLLTYFLPLVL  
MLVSSIGIVIFLCRHSRNDKDVTPSDISHSHVHVAVAIMLICLIVLFIVCSTTALSINL  
QIASGQLELIIALPLTDLIYSAGSPVILIIGTVKLRKSVGKLGHPKW

>LC\_T2R44

KMVAAILQRYVGMIFGWGCLGNTFIIILVFLLEYRRNGMLQPYELIITLLAVCSSISEL  
VHFARAVIYVLDLCAHFLEAVFKLADFTLVFFSKSSYWLTAWLCFVYCVKIVKIKWRFFM  
RLKLRIPLVNFLIIGTALLCFSISLPVIYRIKFRNTSTNMCKHYYITMNQKEISLLYT  
MLSLLTSFLPLLLMLVSSIGIVIFLCRHSRNDKDVIPSNTSHSHAHVTVAIMLICLIVL  
FIVCSTTALSVNLQIASGQLELIIALPLTDLIYSAGSPVILIIGTVKLRKSVGKIHPKW

>LC\_T2R59

MGVADIVQLGVSMILIGIGFYGNTFIIILVFLLEYRKSQTLQPYELIVKLMSICSILIESV  
YIVKLVVYLLNFCTYFGENIYRVTDFFIILLHKTIIWLNALWLCFYFVKIVKVNWRIFLR  
MKQRISLAVKFMIIGTLLCFSLSFPVAFRVKFKTNSSSVCRQYFPATDDRKNSFLYSSM  
ISILTSFLPLVLMVSSLGIVIFLCWHSRNDKNTIPNSMCTSRSDAHTSVAIMLLCLIA  
LFIACTGTSLSVNIQVAMQFEVQIAIALSNIIYLTGSPVILIIGMVKLRNRFKLICTK  
G

>LC\_T2R50

MAVSDITLLSVAMFMVWFGCVRNTFVIVVFFLEYRRSRTLQPYEAI IIMALCNLLLVLT  
TVSWPVFFFDLCALLGQVFYQVTDLLLIFLPKSIWLTAWLCFVYCVKIVKVNWRFFLR  
KQKVS LVKCLITGTMLFCFLLSIPVFSMIKLRPNTTDTCRYYKATDDIEISLLYTILL  
SLLTSFLPLVPMVSSLGSVIFLCWHSRNTDKNVTPSSTTCSNVHTSIAMMLLCLIAIFI  
VCTGTALPVNIQIGIGQHSIRGESAITQLLYSSGSPVILIVILIESRDSRSSASASRRTA  
Y

>LC\_T2R51

MAISDITLLSVAMVIVWFGCVWNTFVIVVFSLEYRRSRTLQPYEVIIMLALCNLLVLI  
SASWLIVFFLNLCALLGQVFYQVTDLLLIFLPKSIWLTAWLCFVYCMKIVKVNWRFFLR  
LKQKVS LVKCMITGTMLFCFLISIPVSFRIKFRPNTTDMCKQYYIATDNLEISLLYTTL  
LSLLTSFLPMVLMVSSLAIVFFLCWHSRSMKNVTPSSTPHSNAHTSVVVMMLLCLIALF  
IVCTGTALPVNIQISMGQHSVRGVIAITQLFYSSGSPVILIVGMVKLRKSFMKVCC

>LC\_T2R58

VMTTADLVPFLVAMVIVFGCLGNSFIIILVFLLEYKRSQTVQPYELIVILMAICGIVLEL  
ISILWFVAYLLNFCTYFGEMIIYKVIDFLLILLPKSVIWLTAWLCFVYCVKIVKVNRRFYM  
RLKQRLSLAVNFMIAGTALLCISISIPSI FLIKFTTNSTNICRQYYTVKEEQVYSFVFGN

MLSLTSLPLVLMVSSLGIVVFLCQHSRNMCKNVTPTGTSHINAHTSVAIMLICLIVL  
FIACAGTVLSLNLQIAAGQLDVLADSLTNI IYSGGSPVILI IGTVKLRKCLGQLCCP

>LC\_T2R60

MATADIVQLCVAVIIIGFACLGNMFIIVLVFLLEYRRSQTLQPYELIVTLLAICNLVSEFF  
FTLWLVVYLLNLCTYFGEVYQVTEFIIIVFLPKSVIWLTAWLFCVYCVKIIKVNQSLFKR  
LKQRISLAVNCMITVTSSVCLLLSFPVTHIKFRPNSTKICRQYHVVDQELSILYATVLS  
LLTSLPLILMLVSSLGIVIFLCLCQHSRNMCKNVTSPSTSHSDAHISVAIMLICLIALFIA  
CASTILCINITFASGQLDVTLVITLTNI IYSAGSPLILIIIGMVKLRHSFAKLFCP

>LC\_T2R49

MEVSDIMLLSMGVLIVWFGCIWNMFIIILVLTLEYRRSQSLQLYEVIVMLISICNLILEVA  
SICWFFVFFLSLCLSVGKLFQVTELTLLFLPKVVIWLTAWLFCIYCVKIIKVNWGFLLQ  
LKQKISLVVKIMATGMVVMCFVISLNVNFIINFRPNTTEVCRKYHMITNNTMNTIYSTV  
ISFFTSMLPLILMLLSCFSIVIFLCLCQHSRNMCKNINSSSSSRNEAHTAVAIMLFSLTALF  
IICAGAALPINIQVGLGQYSTRRIIAITQALYSAGSPVILIMGTVKLRKSFINFCSINHC  
KLHSNTL

>LC\_T2R47

MTVRDIVFLSVDMTLLWFGSTWNTFIVLAYFLEYRRSQTLQPYEVIVMLIALSNLLMELS  
SVSWLVVLFLELCAPLGEVFFQVTDLLIFFPKSMVWFTASLCCVYCVKIVKVNWRFFLR  
LKQKISLVVKFMIFLTLLISISFSLPVYTRIRFNYNSTNMCTHYFFIEGKEQVSIIFAVI  
LSFFTSFLPLAIMLVSSLGIVVFLCLHRSRNMCKNVTSPSTSRGEAHTSVAIMLLCLIALY  
ITCAATAQVVNIEVSSGNFDRREAVAVTELLFAGGSPIIILITGIMKLRKVFLKLCFSKGV  
KVQT

>LC\_T2R48

MTVRDITVFLSVDKTLWFGSTWNTFIVLAYFLEYRRSQTLQPYEVIIMLIALSNLLMELS  
SVSWLVILFLELCAPLERCSSKCFAYLLPKSMVWLTALLCCVYCVKIVKVNWRFFLRKQ  
KISLVVKFMIFLTLLLLISFSLPVHTRIRFNYNSTNMCKHYFIIIEGKEQVSMVAAILSF  
FTSFLLLAIMLVSSLCIVVFLCLHRSRNMCKNITPSSTSRGEAHTSVAIMLLCRIALYITC  
VATAQVVNIEVSSGNFDRREATAVTELLFTGWSPIIILITGIMKLRKVFLKLCFSKGVKQ  
T

>LC\_T2R46

MSMRDIVFLSVDMTLTFWSSIWNIIVLVYFLEYRRSQTLQPYKGVMLIAFSNLLLELS  
TVSSLVLSLELCAPLGEVFFQVNTLLIFFPKSMVWLTASLCSVYCVKIIKVNWRFFLW  
LKQKTSVFMKFMIFLTLLISSFSLPVHTRIRFDYNSTNMCKQYYILKGKEEVSMFTGI  
LSFFTCFLPLTIMLVSSLGIVVFLCLHRSRNMCKNITPSSTSRVEAHTSVTIMLFCIALF  
VTCAATAQVVNIEISSGNFDRREAITTELLFAGGSPIIILITGTVKLRKVFLKLCFSKGM  
KIQT

>LC\_T2R45

NMRVTDIVCMSVSMVLLWFGCVWNTFIMVVFQYRRTRTLQPYEVIVMLLVSSILLEL  
VSVSWLVIIYFLNLCLYGEVYQVSDTFILFFPKLIVWFTASLCLVYCVKIVKVNWSFFL  
KLKQKISLVVKFMIFLTLLICAFISIPVHSVIFNFNATNVCREYFILQDETKNSPIYSF  
LISTLTSFLPLIIMLISLGIIVFLFYHLRNMCKNAIPNSTRNDAHTSVAIMLICLIAL

FVVCAGTALSVNIQIALGQLDIAPAITITQLLYSAGSPVILIVGMVKLRKRFMNLCCKG

>LC\_T2R63

RMGAAAILQMFATMILLGIGCFGNSFIMLVFLVEYKRSWTLQAHELIVTLIVVANIVNEL  
IYVFHFHAIHFFNLCFYNGETIFALLSLLEGLIPKVISWLTAWLCFVYCVKIIKVNWRFFM  
RVKQRISLAVKVMII GTIGLCC LISVPIYFMIHLKGNTTKGCRDFYVKVSEKELSVLYGG  
TLTFFFTSFLPLLLMLVSSVSIVIFLCQHRSRNM DKNMASSSSSHNEAHTSVAIMLICLI AL  
FVVCNGTFLYINVQYAAGHFELLVLSALANTIYSSVSPAILIVGMVKLRHTFAKFFFRKG  
RRYSDQ

>LC\_T2R64

QNVSRFKLFSTMIIIGFGCLGNSFIVLVFLVEYRRGRTLQAYELIVTLLATCSIVNELLH  
VIWFTIYFFNLCFYNGETFFKWFSLQTFPKAATWLTAWLCCICYCVKIIKVNWRFFMRL  
KQRISLAVKCMIIIVTAVLCSLLAMPVLFMVHLKGNSSNNCRELYIQDDEKELSFLETSML  
SLFTSLLPLVFMVSSLGIVIFLCRHSKNM DKNVTPSSTSRNEAHTSVAIMLLCLIALFI  
VCAGTVLVFNLNIA PGRFDLLVVISLSNIIYSSGSPVILIVGMVKLRNTFAKLFCQKPI

>LC\_T2R41

MTTSVIVQLVVAMTIMGVGSLGNSFIVLVFFLEYRRFRTLQSYELMVTILAFFSILYEMV  
AVLWFVYVWFSFCSYFGEKFYKVTDTLIIFFTKSNYWFTAWLCFVCSMKIIKVKWKL FAR  
LKQKISFAVRFMIIGTLLLCFSVSFPIMYGIRFRENSTQMCKNYIATDKKVNSLAYFGM  
LSLMTSFLLLVLMVSSLGIIIFLCRHSRNISKNVTTSSSSSSNAHSAVAIMLICLI ALY  
IACTGTALCLNLQVTSQGFDVLI AIA YTNVIYTTVSSVILIS ETVKLR T SF CRLCCPKTH  
K

>LC\_T2R42

NMTTAVIVQLVVAMTIMGFGSLGNSFIVLVFFLEYRRFRTLQSYELMVAILAFFSILYEM  
VAVLWLVVYWF SFC SYFGETFYKVTDTLIIFFTKSNYWFTAWLCFVYSMKIIKVKWKLFA  
RLKQKISFAVRFMIIGTLLLCFSVSFP IYVGIRFRENSTEMCKNYIATDEKVNSLAYFG  
MLSLMTSFLPLVLMVSSLGIVIFLCRHSRNMSKNVTTSSSSSSDAHLAVAIMLICLI AL  
YIACAGTALCVNLQV ASGQFNVLIAIAYTNVIYTTVSSVILISGTVKLR T SF CRL

>LC\_T2R80

MAIVDIVNLGVAMIIIVISCLGNTFIIILVFILEYRRSQMLPYELIITLMAACNLMTELIF  
MVWYVYVFFDFCTYLGDP IYKVTDSVTVYVAKTG IWLTA CLCFVYCVKIVKVNWRMFMRL  
KQKLLVVKYMI VV TLLLCILLAFPVALLIKLNINSTDICWNYYMIEEERELSFYTG T LS  
ILTSFLPLVLMVSSLGIVIFLCIHSRNM DKNITPGGSTHIKAHTNVAIILLCLIALFVA  
CAGTAMSCNLQV VSSQVSVLLAIYKNI IYSSGSPAILVIGTVKLRDSLVRIFCTKGGGV  
TTETVKTL SMCVYNGW

>LC\_T2R02

MELSVRVSFLVAFVAYLLALCMNLFILVRYFHAVRKGEVLQPSDLLLIGLIVCNVHQT  
SILALSVLGLFHVGCYAGGYMFKTLSLVFTSASSAQFWLMAWLCTFYCLNIVRISRFFI  
RMRQCVSGLVPHLLAGSVIGTFVSLPYFVYVPVVSNNGLANSTICLMDFRSPAPFYS  
LYLTLNCLLPLVLMVASSSVIIMFLHCHVRRMEENTSGFSSPRSDAYLRITKMLLSLVCL  
YISFNVATILMNLIKNFCGLIISSFAEVYPSLCAIIIIILGTSKLRQGSTPHCPRCLCL

>LC\_T2R03

MNTAYNIGILVIATALTALTAIGAPGNLFI LAINLSTVRSQQVLPPTDLIISGLALSGIVFQT  
FLVYLVYME LLG MTCQMEISTFM MIFYITDALG SVNFWFISWLCIFYCAKIVRSGSRLVI  
RFQQWINGAVRHLLAWSAVGSFTVPVCY YVFS LGMNHTDILN NCTNLNIAEHKQIVDDSY  
YCLYLVLCCLLPLVIMTTSSSFILLFLRRHAMRMQRSAADGFSSPSSEAHVRVSKMVLSL  
MGIYTVFDISIMIFIFTSNEILVLITILLCYLCPGVTPVIIIWGTAKLRNRLPTACWSK

>LC\_T2R04

MYFDFLIAFCVSI FVLLVIGVSGNLFILVSNLNTVRSQQGLPPSDFILTGLSTCNIIFQI  
SNGTIGVLLLLLDVIYTMQNYAWRLYFYITELLV SIGFWFTAWL CVFYCAKIIRSSSRLVI  
QIQQWIVGAVPHLLVWSAVGNFV VCTPKLVLI FLRNETKTSCNSSFGHFRESKWKLDYMN  
TFYLALCCLSPLVIMITSSSFII FLRRHVAKIRRN TTNGFSSPSSEAYVRVSKMVLSLM  
GIYSTFDVCFMISLFTTNEVLF LIIIFLCHVYSSVTAAL IILGTTKLRKRFNTVCWSKCC  
NLLKIGI

>LC\_T2R01

MLPSVQFSLWIINSFIIVASIFGNLFVFLMNYRSYRRKGYFLPCELICCALSAISGFLEV  
VFYLWMSMSELDRSCLISQACYISLLL VIFSLHSALLWITAFLLFFYS AKIVIEPIHCYT  
KVQDAILKHAPT VLA AIFFFSFTFN IPIILSKHTANETNTQQCGNLVVRDKIIFLSIYL  
PITAILPAVVMVKSSISILVHLM IHLRHLKANTNGFHTPKLSSQMRVVRMTLVLTIVYLI  
ALITYVLCMTFAMINNNRLFEIAGTAASIYTMASSLILSYGKQSHWNE LAKLWREFVALF  
P

>Lc\_T2R61

MSAADTVQLGVAVIIIGFGCLGNAFIILVFLLEYRRSRTLQPYEPVVT LVALCSLMAELI  
CLVKLV IYMLNLCTYFGETIYKVIDFFTVFLPKSTIWL TAWLCFIYCMKIVKVNWRFFMR  
VKQRSTLALKGMIILIAMLCFSLTFPIITHIKFSSNSTNICRQYYIVDQELSFLFASVLS  
XLTSLPLVIMLVSSLGIVIFLCRHSR NIDRNVT PGGTSHSDAHTSVAIMLLCLIALFIA  
CAGTAF CVNITL GSGQLDVVIVIALTNIYSSGSP IILIIIGTVKLRNSFAKLFCAKGWTS  
SFRQCGC

>Lc\_T2R62

MSAADIVQLGVAVIIIGFGCLGNFIVLVFLLEYRKS WTLQPYESLVTLVALCSLMVELV  
YVVKLV IYLLNLCTYFGETIYKVTDFFTVFLPKSTIWL TAWLCFIYCMKIVXVNWRF LMR  
VKQRSTLAVKGMITL TALLCFSLTFPIITHIKFSTNICKQYYIVDQELLFLFVSM LSLLT  
SLLPLVIMLVSR LGIVIFLCQHSR NIDKNVTPGGTSHSDAHTSVAIMLLCLIP LFACAG  
TAF CVNIMLVSGXLDVVI AIALTNIYSSGSP IILIIIGTVKLRNSFAKLFCAKGLKLSFR  
ECGC

>Lc\_T2R29

MMAIDAVLQMLAEVIIVLIALAGNSFILCVYFLDYKRNKALQTNELLVTVFASFN ILIQI  
NLFIFWVYVYLF DL CINFGEIFYKVTYFIAIFLSKSSYWFIAWLCFIYFMKIVKIKNRFFM  
GLKQNM SLLVIVF ILFTFLVSFSVALPGIYMVKLKTNSTSISELCKDX YVIGKFGYIYGA  
FLNILTSFLPLVIMLISSIGIVIFLCTHSRKMKN AVARSSSNEDAHTAVAVMI IYLILL  
YVFCTITVLS ENLQIALSHVYVLVTISFISSIYSAGSSVILIIIGTVKLRHSFKKLCCLC

>Lc\_T2R55

MGASDIMQMSVSMVMLWFGFLGNTFIIILVFFLEYRRSQTLWPYELIVTLLSLCSILMELS  
TVIWLIVYFLDLCTYVGEMLYYINDMLIIFFPKMAIWFTT~~X~~LCFIYCLKIIKVDWRFFIR  
LKQRISLAVNCMITGSVLLCLLLSIPVSFQIEFTPNTTKMCRLYYKPTDDKELRLIYASI  
ISLLMLFLPLVLMMLASRIGIVIFLC~~X~~HSRIMDKNVTPKSSSHSEAHTSVAIMLLCLIAFY  
IACAGTALSANLKTVSGEFDLAVAIILMQLIYSAGSPVILIIIGMVKLRNSFGKLCFSKR\*

**Part 2**      **Latimeria V1R protein sequences in fasta format.**

>Lc-V1R01

MDLCITIKGVSFLLQTGLGVLANLIVLLAYTHIAYS DHKLVAVDMILFHLAFVNMMSLLT  
RGIPLTMTIFGLRHILNDAGCVLVVFIYRVV RALSVCITCLLSWFQAITIVPATSKLSRF  
KIKVPNYIIPSFVVLWLNIFIYSGVPY YTTAPTKNSSVPKYTMSTGFCYVIFPNQMSFS  
LYGVVITSRD LIFVILMILASGYILLILYRHRQQVKALRNPEYSTKSTAESKAAKIVLTL  
VLFYIAVFGIENIIGLYVTSLSQVHEYIIDLRV FVSSSYASFSPLIILNFNKKIKSRLRC  
AFLE

>Lc-V1R01a

RMDLCTMIKGVSFLLLETGLGTLGNFLILLAYAYIVFREHKLSPVDMIFCHLAFANMMVLL  
TRGV PQTMTVFGLCNLLNDVECKIVIYTYRIVRALSVCITCLLSMFQAITVAPVTSTWAS  
IKMKAPNNIIPSFLALWLNMAVCI AAPFSSKAPRNGTVPEYTLNLGFCHVDFKDQVSYV  
INGIAVTMRDCIFVILMVVASCYILL LLLHRHSQKVKSIRSSDRNQKTTAETRAAKIVIML  
VLLYVVFVGIDNI IWIAMLTIAKVSPVIADMRVFFSSCYAALSPFLI ISSNKKIKAVLRC  
NSQQREPRDQATDISYVT

>Lc-V1R07

MDLRAIMKATSFLVLTIVIGIPGNFTVLAVFSHIAFTEYKLLPTDIIVTNLALVNFILVIS  
RGFPQILTA FQLRNLFDTFGCKLIIFAFRIARALSISMTFLLSASQSVTISPATSRLSFL  
KQRLPKYLWPLIVFFWLLSGATSVTSILYSTADPNSTASQFTFNLEYCYVAFPGKDAYEG  
NGTMYVSRDLTFVILMALAS IYILFVLYRHSQQVKSIRNPNRNQG TSAESRAAKTVVTLV  
ALYVIFFGVDNLIWIY SISISRVSPMISDIRVFFSSLYATVSPIVII CSNKKIINKLYCT  
RRNQVSQAVEIIFTTV

>Lc-V1R11

SMDAYSFLKGVFLFLLLAVIGIPCNF AILGAFGKMIYLGKNLFPVEGII CLLALVNTMMIL  
TRGVPHILFVFEIRRLYSQHCAV IYMARVSRAMAICLTCLLSCSQFLSITPPPSKWIS  
LKAILSKTKNLALIVVCLLFLNLGLCVC SVLYAMPETNSTNLNFTYNLGYCIVKFPNRHA  
YLGFGLSLLARDLTFVTSMVIASIAIVMTLLRHRQVSSIRRSSQSHEATVETQAAKSVV  
TLVTLYVLFVFGIENTIFLYTMTGHQVNSVLS DVRFFFSTCYASVFP IVAIVASSKIREQL  
KCFTQSKE

>Lc-V1R12

MNLYNLMKGLIFLLMGIIAIFGNLIIMVLF IHIVYVEGKLMPTEFILLNLAWTNMQMVAS  
RGIPQSLYVFG LKKLFNDSGCRAI IYSARISRAMVICLTCHLSCFQCVTIATSNPKWILV  
KTKMQKYL VHTIFSLWVFNMFICISRILFTFSPFNSTSPENTFNLGYCVVFPDPKVSFEV  
NGYILFTRDIVFVALMALASACILFLLHRH KRQM QSRRSGRNQESNAENQAAKIVVTLV  
SLYVFFFGIETTISLYQTTIPASVVSIVSDVRYFFSICYCTIFPFILCRFNQKIKNKLKS  
SVGETEKKQIKAFFCN

>Lc-V1R13

MELYNLMKGIIF FIVAIIGTVGNLVVLALFLHIA YQHKLTA AERLLLNLAWSNSIMLLTR  
GVP HSLFVFGRLRDLFSDIGCKIVVYLSRVSRAMSI CLTCFLSCLQCIT IATSTLKWVYI  
KVKMQKYVIPITV FVCLLNMIICIGSVIFSISGTNSNYTQFAFN LGYCIVNFPDKLTLHF  
NGFAPFARDIVFVAMALASAYILLILYRHGKKVKGIRNSEHSHESTAEGQATKTVVTLV

TLYIIFFGIDNTIFVYQIAVSKEVHTIVSDIRFFLSICYGLVFPFIIIGFNSKIRTKLKP  
SSSEQQTEVQEVSSI

>Lc-V1R14

MDLYNLVKGIIFILTAIVGVSGNLVILVSFYHIALQERKFVTAQVILLNLAWANMIMALT  
RGVPHSLFIFGLRFLFDDIGCKIVVFASRVSRAMSICLTCLLSCFQCITITKSTLKWLSL  
KGRMQKYVILIIIGLCVMNMLVCIAAVLFVSSTNTTNTLEYTFNLGYCLVTFPDQLSFQV  
NGFAIFARDIIFVVLMLASAYILLVLFHRGRQVKGIRSSDRNNVTTAEGQATKTVVTLV  
TLYVLFVFGIDNTIWFYQITVSKEVHSIVSDIRFFFVSVCIASICPIVIMFNPQIRNKLKA  
SSSEQETQVQEIISSTQ

>Lc-V1R15

RVIFILITLIGTAGNLVILVSLTHIAYQEHKLLAIEKIVFNLSGANLVISLVRGIPHNLF  
LFGFRNLYSDVGCKITGYVHITFRAVAIVLTCLLSCFQCATIARGRSQWTFVVKLNQKHL  
EWIIFGLYLFCMISTIDVIPFSISGQNVTNLKFVAVSLGYCFVVPDNIMFQLVGYGIFAR  
DFLFLVFLMTLASSYILLILYKHKRQVQGIRSTERNHETTAEGQAAKTVVTLVSVFYVSVFG  
LDNTIWFYIEIVSKIMFPVAFDIRNLFSMCYASFFPIVITFNKKIRHQLKCPRGEQKQI  
ACLSS

>Lc-V1R16

VMDLYEILRRVIFILITLIGTAGNLVILVSLTHIAYQEHKLLAIEKIVFNLSGANLVISL  
VRGIPHNLFVLFGRNLYSDVGCKITGYVHITFRAVAIVLTCLLSCFQCATIARGGPQWTF  
IKLSLQKHLEWIIIFGLYLFCMITTIDVIPLSISGQNVTNFKFAVSLGYCFVVPDNIMFQ  
LVGYVIFTRDFLFMILMTLASSYILLVLYRHGKQVQGIRSTERNHEPTAEGQAAKTVVTL  
VSFYVSVFGLDTTIWFYIEIVSKRMFPVAFDIRNLFSMCYASFFPIVITFNKKIRHQLK  
PRGEQK

>Lc-V1R17

KMDPEIVNGAVHFVISIIGIAGNIVILASFHITYHKRKIMAVEKILVNLSGANLIILVS  
RGLPLSLYAFGLRNLFNDFCCQFIGYVHITFRALSVALTCLLSCFQSIMLAKNSPKTAKL  
KLKLQTHIVPILSLLCIFSMLCSVDVIVFSVSSYNVTVPQYTAAMGYCLVFPNIVTFHL  
VGYGIFTRDFLFVFLMALASSYILLVLYRHGKQVQGIRSMERNHESTAEGQAAKTVVTLV  
SFYVTLFGIDNTIWFYQIISKGLISKVFDIRTLISILYAVVFPFVIIAFNKKIRSKLKCF  
TSEQKSEISIIIEEMKHIQ

>Lc-V1R18

SMDPETVRGAGYFVITIIIGIIGNVVILTFSHIAAYQERKIMAVEKILVNLSGANLIILVT  
RGLPLSLYAFGLRNLFNDLCKIISFVHISFRALSVALTCLLSCFQSIMLAKNSPKTAKL  
KVKLQAHIVPILSLLFIFCILCSVDMIVFCISSYNVTVLEYTDTMGYCLEVYPNAVVMFHL  
VGYGIFARDFLFVFLMALASSYILLVLYRHGKQVQGIRSAEQNRESTAEGQAAKMVVTLV  
TFYATLFGIDNIVWFYQTISEHMISQEFDRTRLISLLYA AVFPLVIVFNKKIQNKIKYF  
VSLQKSELSLTE

>Lc-V1R19

MVSVTGRGAVYFVITIIIGIIGNVVTLTSFSHIAAYQERKIMAVEKILVNLSGANLILLMTE  
GLPMSMYSFGLRHCFNDACHEFIYVVKMTFRGLSVVLTCLLSCFQSIMLAPNGPKTAKLK  
MKLQVHIVPILSLLFIFCILFNVDMSVFCISSYNITVLEYTDTTEYCFVAVMFDLMGYGVF  
ARDSLFLVFLMALASFYILLVLYRHGKQVQGIRSAEQNRKSTAEGQAAKMVVTLVSVFYVTL  
FGIDNIVWFYKTFAYQLISQEFDIRMLTSLLYVTLFPFVIVFNKKIQNKIKYFVSLQKS  
ELSLTE

>Lc-V1R08

MEVRLIFKAAGSIFLEALGIPGNALILATFVFIGISNRKLLPADILLMKLAFVNLIVMLT  
FNIPTTVSAFQVRKLFNDDGCKTVIFLFRVGRAMSICITSLSSYQCIVLAPSFNACIIL  
KQKCPQSLFHITAFWLCLNTIIYAVCVPSMAEQSFAKSNYSIPMAYCVVSFSPSYTFFAVL  
GMVFIVRDLFFIAIMVSSSSCIVFIFYLKHMKQVKGIRSSAKNHGRTAETQAAKAVVMLVI  
LYVFLFGLDNI IWAYSLSLNSVLVPEITDVRHFLASCFPSISPIIIITTNKQLQNKLRFIS  
QRKKLQNAETVVSINVHTI

>Lc-V1R09

MDIQVIFKVISFLLLVVIGIPGNITVMAAFVHLRLSDSKLMPPDIILTKLAFVNLLVVFT  
RGVQPQVLTALGIKKLFNNNGCRAIIFLFRVSRALSICMTALLSCYQSIVLAPSSKRWRIL  
KQKMPQKLLLVIIIFWCVNMLIYSWTLIFSYPNLTTEYTLNLEFCFVVFPTFAFYIGN  
GTLYLFRDFLFLVGLMVLASGYIVFIFYLQHRKQVKGIRSSDRGQENTAETRAAKAVVMLVA  
LYVILFGLDNI IWIYTLQVSKVATVVS DARVFFASCYSALSPILIIATNKKIQMKLKS LG  
QNQHHQTPETS SVSHVQV

>Lc-V1R10

MNIRVTLKAIGFFLMVVIGIPGNFTILAVFALIKLSNGKLLSTDIILTKLAFVNLLIVLV  
KGIPQAFTAIGIRKLFNDNGCRAVLLLYRVS RALSICMTALLSCYQSII IAPSSNRWRAL  
KQKMPQKLVFIMIILWCVNIFIYSWTLFSFAQLNSTTTEYTLNLEFCFVVFPSFYIG  
NGTLYLFRDFLFLVGLMVLASGYIVFIFYLQHRKQVKGIRSSDRGQETRAETRAAKAVVMLV  
ALYVILFGLDNI IWIYTLQLSKVAPEISDARVFFASCYSAISPILIIATNKKIQMKLKYL  
GQKHHQTPETTISHVQMEM

>Lc-V1R05

MVLSASISEWITYMVFTFIGIVGNSILIHGILTCPTGRLRPSFLLLFSLAAVHMARNVVV  
NLLSIIYSAGGVSVFGSAGCKVFKFASALTGTLGIWFTLYTVVFYSVKLEQAVHPLNCAV  
NTNWRGYHLAIGFVLWVAGLVVCCPIAVFAEKAKVQVVGNVTHPYRSSVYVGCRCNYPAP  
EVALIYGTALTAIDLVLVLAIFSI RIMLLLRKRTGVQFGDIWIGERTETDVFRAAKC  
ALLLVLLVTALWVSHFTILQCLRRLDEYYFIPTVLAVLSSGYATLSPYLLMI INYRIRAN  
L

>Lc-V1R02

TMGTWSIIKGTAFHILTVIGMPGNLIIVYAFSYAAYS DHKLMPADII VLNALVNLMMVVL  
VRCIPEMLAAYGINELFSDSGCKIVICIRYTRALS IWLTFLLSGFQCISIIAPITTKWAA  
FKLQAPGHLFGVLAFLWVFNVGFSIPALLYGISSGNSTGNGFSINLEYCFVKFSPQYVK  
ITVGNLQISRDI IPIFLMIFASVYILLILYHHSQQVKHLQSSNRKRGSSAEIRA AKAVIT  
LVLLYVIFFGIDNVLWVYTLTIKAMTTSVISDLRVFFSSLYAAVSPIVII VSNKKVQKRL  
KCEREQQGSLAPETVTSTVRM

>Lc-V1R04

MSQGEHPVQLFFYTMLVALGIVGNSLVIWIVLDTARAANTIPSSDFILLNIAVVNLLISL  
TRNTLLALDIDYTFMSMDGACRILMCIWVWFRCVGVVWTLCLSFHFVMVIRSSHSALGK  
INERRNVIVIVAVLWALNLLYSSTALALTSNTSTNISSLVVISSTIRPLLGCWVIFSTDT  
AALFYGILSFIVHEI IPIFLMIVITNCGTLFLLYKHRQVHRADIAITRVESEWKA AKTIL  
ALILLFVFCWGTHIVSVNYYNFYSSSSTRYMLIIARFSASGFLGFYPLVVTFGH SKLKRK  
FHSVLFWRKQNEVS

>Lc-V1R03

MRF SADNVFYGILVLLGIVGNLLVVVTITVAGYEVGTILASDFILANLAI VNF LISTIRN  
VPLFISDLGLKIYLSRDYCKIFMFLWVWLR SVSIWATFCISFFHFLVIRRHHSVLRK GK  
ELRNIIITTSVIWIGNFFYAFPTCFYSTRAYGNETDTIQLLSATTRPFLGCIWKFP SLYS

GVAYATASLVIHEVFPIFLMVVINLGTLYILYRHSRAVGVETLVTRVASERRAAKVILIL  
VTLFVICWVTNVLNVNHNTEKSIRVFMVLANFGASLFIGFSPVVLVGVHSLRKKLMN  
FTLYLNGIKQKRGKRLTTGK

>Lc-V1R06

MELTRIIIFLVIRILVCLFGMTGNVAILSVLIKRAFTFRLKTFEMLLVGLTASNFTQELLV  
DVPEIMKELSGVTIHRWFCKTLKFTFTFGRANSIIFTILICIFRYQKLRHAVSRVNLVPP  
LDNVKIIHVISASVLAFTFLFSVPVLLHETNVEMTLKNQTSCPALFFDCPKINCEVSYMA  
YKLIYLACIDILPILIIILVITTHLLRILYKNYKLVSVTLDFGSPNKSIIKDSKVRFWKST  
KAVLAALLLFQISWTMQLIIIEFAVSSKKFDYWSETDFLIIVALYTSLSPTYVFGIGNNILT

### Part 3 Tree file in Newick format for T2R and V1R sequences shown in Fig. 1.

(Frog\_T2R24--Intact\_1/1-288:0.0000002748,Frog\_T2R25--Intact\_1/1-288:0.0061379003,(Frog\_T2R46--Intact\_1/1-294:0.3733089728,((Frog\_T2R27--Intact\_1/1-290:0.2221290239,Frog\_T2R28--Intact\_1/1-279:0.4525430920)0.9342195967:0.0616636549,(((Frog\_T2R1--Intact\_1/1-289:0.3918210492,Frog\_T2R29--Intact\_1/10-301:0.3138129339)0.9998500075:0.6509752150,((Frog\_T2R26--Intact\_1/1-278:0.3711378041,(Frog\_T2R6--Intact\_1/1-273:0.0094976265,(Frog\_T2R47--Intact\_1/1-273:0.0000002215,Frog\_T2R7--Intact\_1/1-273:0.0195082828)0.9763439383:0.0658202988)0.9998500075:0.5006437566)0.9998500075:0.3801097940,(Frog\_T2R31--Intact\_1/1-291:0.8850268367,(Frog\_T2R48--Intact\_1/1-282:0.7657574314,(Frog\_T2R4--Intact\_1/1-277:0.6385856814,Frog\_T2R5--Intact\_1/1-279:0.4458799738)0.9754412424:0.1318760028)0.9998500075:0.2293353457)0.9865069539:0.1239015508)0.9378150222:0.0721907075)0.9879578039:0.0652087928,((Mouse\_T2R138--Intact\_1/1-294:0.9031576543,(Mouse\_T2R137--Intact\_1/1-294:0.7042337608,((Mouse\_T2R130--Intact\_1/1-291:0.4385864984,(Mouse\_T2R106--Intact\_1/1-292:0.2818384502,(Mouse\_T2R107--Intact\_1/1-291:0.2849591325,Mouse\_T2R105--Intact\_1/1-286:0.2660859742)0.9723242732:0.0646695120)0.9998500075:0.3361107536)0.9979043880:0.0868222191,(Mouse\_T2R131--Intact\_1/1-284:0.7859857277,(Mouse\_T2R122--Intact\_1/1-288:0.7037181079,(((Mouse\_T2R110--Intact\_1/6-304:0.1082852785,Mouse\_T2R123--Intact\_1/6-304:0.1211486462)0.9998500075:0.3223047861,(((Mouse\_T2R140--Intact\_1/1-289:0.2436963423,Mouse\_T2R33--Intact\_1/5-293:0.3706334350)0.9998500075:0.0968005162,(Mouse\_T2R129--Intact\_1/1-290:0.4588650720,(Mouse\_T2R109--Intact\_1/8-296:0.1985785813,Mouse\_T2R117--Intact\_1/8-300:0.1846564081)0.9998500075:0.2022169044)0.9998500075:0.0921111990)0.9998500075:0.0587036556,(Mouse\_T2R116--Intact\_1/1-282:0.3428180861,Mouse\_T2R115--Intact\_1/1-288:0.4288254583)0.4105026718:0.0346008006)0.9975443582:0.0708063645)0.9998500075:0.1320818669,((Mouse\_T2R102--Intact\_1/1-288:0.3628453575,Mouse\_T2R121--Intact\_1/1-284:0.2644732676)0.9998500075:0.2189963426,(Mouse\_T2R120--Intact\_1/1-277:0.3287041177,Mouse\_T2R136--Intact\_1/1-282:0.5241267547)0.9998500075:0.2446176559)0.9414543548:0.0458026860)0.9998500075:0.1757008610)0.9490440789:0.0649372416)0.9035413101:0.0311880086)0.9632949517:0.0745057136)0.9998500075:0.2403221472)0.8946574099:0.0910537499,((Mouse\_T2R144--Intact\_1/1-296:0.3758235385,Mouse\_T2R139--Intact\_1/1-296:0.4073920274)0.9998500075:0.4680788472,((Mouse\_T2R118--Intact\_1/1-285:0.5965238209,(Mouse\_T2R19--Intact\_1/1-

285:0.2106430974,Mouse\_T2R143--Intact\_1/1-  
279:0.3094531221)0.9998500075:0.2891300067)0.9998500075:0.2452615405,(Mouse\_T2R126--  
Intact\_1/1-289:0.4058522818,Mouse\_T2R135--Intact\_1/1-  
285:0.6821576804)0.9975668290:0.1547817789)0.9998500075:0.3479581461)0.7979166001:0.073929  
7367)0.9998500075:0.0819470797)0.9289610049:0.0581981313,((Frog\_T2R30--Intact\_1/1-  
300:0.9062570021,(Frog\_T2R8--Intact\_1/1-269:0.9007409140,(Frog\_T2R23--Intact\_1/1-  
271:0.7381519644,Frog\_T2R3--Intact\_1/1-  
275:0.7272333570)0.9987759778:0.2317261906)0.6821274937:0.0912610841)0.9998500075:0.137210  
9008,((((Frog\_T2R40--Intact\_1/1-289:0.1458985270,(Frog\_T2R38--Intact\_1/1-288:0.1521294026,  
(Frog\_T2R22--Intact\_1/1-285:0.0345396566,Frog\_T2R33--Intact\_1/1-  
290:0.0428990478)0.9998500075:0.1581041192)0.9961836450:0.0510787711)0.9998500075:0.2797433  
222,(Frog\_T2R42--Intact\_1/1-296:0.3854962307,((Frog\_T2R49--Intact\_1/1-285:0.0323170027,  
(Frog\_T2R12--Intact\_1/1-287:0.0176918276,Frog\_T2R2--Intact\_1/1-  
296:0.0352917461)0.9998500075:0.0468335502)0.9998500075:0.2154881124,(Frog\_T2R36--Intact\_1/1-  
282:0.1217904578,(Frog\_T2R35--Intact\_1/1-287:0.1014041177,(Frog\_T2R34--Intact\_1/1-  
278:0.1185097153,Frog\_T2R9--Intact\_1/1-  
287:0.0713945826)0.9998500075:0.0719058910)0.9998500075:0.0414708583)0.9487207693:0.042240  
2473)0.9998500075:0.2389850684)0.4102013257:0.0254100847)0.9982245487:0.0767021319,  
((Frog\_T2R11--Intact\_1/1-292:0.1159778516,(Frog\_T2R10--Intact\_1/1-288:0.0296983799,Frog\_T2R32--  
Intact\_1/1-288:0.0772730699)0.9998500075:0.1086010445)0.9998500075:0.2702914061,(Frog\_T2R39--  
Intact\_1/1-290:0.1469973676,(Frog\_T2R37--Intact\_1/1-292:0.1459488761,Frog\_T2R41--Intact\_1/1-  
292:0.1553934289)0.9671853200:0.0331965325)0.9998500075:0.2753950401)0.9503958005:0.070057  
2092)0.9998500075:0.7052549070,((Frog\_T2R43--Intact\_1/1-291:0.0578466558,(Frog\_T2R44--  
Intact\_1/1-290:0.0925474181,Frog\_T2R45--Intact\_1/1-  
291:0.1325607965)0.9998500075:0.0700771907)0.9998500075:0.6420054887,((Frog\_T2R20--  
Intact\_1/1-285:0.3373772633,(Frog\_T2R17--Intact\_1/1-264:0.2007812849,(Frog\_T2R13--Intact\_1/1-  
283:0.1509911882,Frog\_T2R15--Intact\_1/1-  
285:0.1890269594)0.9310123562:0.0516363097)0.9998500075:0.2528057998)0.9998500075:0.492585  
9134,((Frog\_T2R14--Intact\_1/1-298:0.2499519682,(Frog\_T2R18--Intact\_1/21-  
316:0.0458904780,Frog\_T2R19--Intact\_1/1-  
279:0.0331506896)0.9998500075:0.1741341250)0.9998500075:0.1720912984,(Frog\_T2R21--Intact\_1/1-  
294:0.6333956294,Frog\_T2R16--Intact\_1/1-  
288:0.3966415364)0.9998500075:0.2132089124)0.9998500075:0.4025672881)0.9998500075:0.219710  
9599)0.7701470506:0.0998139940)0.9047440837:0.0727900033,(((Fugu\_T2R2--Intact\_1/1-  
266:0.5917590332,(Zebrafish\_T2R1--Intact\_1/1-277:0.0523906386,Zebrafish\_T2R2--Intact\_1/11-  
288:0.1266083844)0.9998500075:0.3121431888)0.9998500075:0.9566320910,((Zebrafish\_T2R3--  
Intact\_1/1-278:0.6843384116,(Zebrafish\_T2R4--Intact\_1/1-275:0.8506332138,((Fugu\_T2R4--Intact\_1/1-

265:0.4022612689,Pufferfish\_T2R6--Intact\_1/1-259:0.2544995359)0.9998500075:0.6254354620,  
((Stickleback\_T2R1--Intact\_1/1-275:0.0525791292,Stickleback\_T2R2--Intact\_1/1-  
271:0.0584899952)0.9998500075:0.5127798477,(Fugu\_T2R3--Intact\_1/1-265:0.2734646871,  
(Pufferfish\_T2R3--Intact\_1/1-263:0.2071478966,(Pufferfish\_T2R4--Intact\_1/3-267:0.0793625976,  
(Pufferfish\_T2R2--Intact\_1/3-266:0.0204205591,Pufferfish\_T2R5--Intact\_1/3-  
266:0.0257494947)0.9998500075:0.1229941207)0.9998500075:0.0772810623)0.9998500075:0.182245  
6845)0.9998500075:0.1596955346)0.9998500075:0.2215333582)0.8859117687:0.0789688473)0.91883  
30177:0.1149542000)0.9998500075:0.8146974982,((LC\_T2R01\_g03562\_fishlike/1-291:0.5112621269,  
(Stickleback\_T2R3--Intact\_1/1-303:0.0800431192,(Fugu\_T2R1--Intact\_1/1-  
302:0.0909182031,Pufferfish\_T2R1--Intact\_1/1-  
302:0.1877375435)0.9998500075:0.1570610348)0.9998500075:0.4874894767)0.9998500075:0.587150  
1788,(((Dr\_ORA5/1-273:0.3649610913,((Tn\_ORA5/1-281:0.0470320901,Tr\_ORA5/1-  
276:0.0572573062)0.9998500075:0.0497635472,(Ga\_ORA5/1-278:0.1135163396,OI\_ORA5/1-  
280:0.2697876206)0.9195871606:0.0346282751)0.9987579191:0.1432637128)0.9998500075:0.569521  
4806,(LC-V1R06-JH127233-161522-162418/1-265:0.6401632111,(Dr\_ORA6/1-266:0.4189193750,  
((Tn\_ORA6/1-280:0.0807957145,Tr\_ORA6/1-280:0.0574373992)0.9998500075:0.1516479691,  
(Ga\_ORA6/1-282:0.2644439764,OI\_ORA6/1-  
266:0.3438426929)0.7466914025:0.0531471395)0.9998500075:0.1973672082)0.9998500075:0.320747  
5341)0.9998500075:0.4795662785)0.9998500075:0.3111708831,(LC-V1R05-JH132282-2162-3064/1-  
292:1.3014475544,(((Pm\_Seq2/1-290:0.4701469976,((Dr\_ORA4/5-297:0.1342224155,((Tn\_ORA4/5-  
299:0.0526967765,Tr\_ORA4/5-301:0.0270545865)0.9998500075:0.0727403330,(OI\_ORA4/5-  
301:0.1267279037,Ga\_ORA4/1-  
300:0.1408959339)0.7591087611:0.0142947800)0.9759306732:0.0577260004)0.9998500075:0.4400309  
068,(LC-V1R4-JH126562-9351125-9352069/3-289:0.5359678746,((Dr\_ORA3/14-308:0.2134264031,  
(OI\_ORA3/22-314:0.1474761312,(Ga\_ORA3/38-330:0.0919497301,(Tn\_ORA3/18-  
309:0.0442699298,Tr\_ORA3/20-  
312:0.0389432232)0.9998500075:0.0669401124)0.9998500075:0.1012879350)0.9976931558:0.0726034  
742)0.9998500075:0.3113894861,(LC-V1R03-JH126562-9337639-9338598/1-  
297:0.2698094668,Xt\_ORA15/4-  
295:0.5280105574)0.9998500075:0.1122992802)0.9929369001:0.0718141845)0.6543531594:0.0559505  
693)0.9963679795:0.1031874826)0.9998500075:0.3321778687,(Pm\_Seq4/4-  
290:0.9949707008,Pm\_Seq3/29-  
284:0.9184710421)0.9368283737:0.1749691667)0.9980564898:0.1359133860,(Pm\_Seq1/1-  
297:0.9384344551,(((LC-V1R01-JH126576-3892974-3893936/1-303:0.3269506469,(LC-V1R01a-  
g18646/2-308:0.1363919186,(Xt\_ORA1/1-310:0.3238949512,(Dr\_ORA1:0.1390371180,(OI\_ORA1/1-  
303:0.0620161150,Ga\_ORA1/1-  
302:0.0705166541)0.9998500075:0.0710790530)0.9998500075:0.1242877439)0.9918667022:0.052037

8991)0.9998500075:0.0687353780)0.9935904895:0.0803900864,(Xt\_ORA14/1-300:0.7036809724,  
(((Vmn1r195/1-308:0.2535184127,((Vmn1r216/3-298:0.0814376981,(Vmn1r193/20-  
319:0.0518665406,Vmn1r204/20-  
319:0.0730623973)0.9998500075:0.0360915502)0.9998500075:0.1336542619,(Vmn1r194/1-  
296:0.1939096252,Vmn1r215/1-  
300:0.1680779797)0.9998500075:0.0686307341)0.9399434685:0.0247208263)0.9998500075:0.2111152  
960,(Vmn1r211/1-298:0.2258934703,(Vmn1r196/1-299:0.2519363793,(Vmn1r200/1-306:0.0804936213,  
((Vmn1r206/1-306:0.0365949105,Vmn1r207/1-306:0.0385095472)0.9998500075:0.0581978680,  
(Vmn1r208/1-307:0.1346451562,(Vmn1r199/44-349:0.0948531673,(Vmn1r212/1-  
298:0.0965359784,Vmn1r222/1-  
302:0.1257796968)0.9998500075:0.0490582272)0.9915702152:0.0270576513)0.8331635616:0.014085  
0243)0.9335529532:0.0109135184)0.9998500075:0.1196250579)0.9998500075:0.1122326398)0.999850  
0075:0.2448738034)0.9998500075:0.3217358136,(((Vmn1r19/1-301:0.0835382723,(Vmn1r18/1-  
299:0.0495047902,Vmn1r28/1-  
301:0.0383298745)0.9998500075:0.0362496937)0.8546416763:0.0382795064,(Vmn1r25/1-  
301:0.1784159592,(((Vmn1r12/1-301:0.0583587722,Vmn1r14/1-  
297:0.0429310180)0.9998500075:0.0731126171,(Vmn1r15/1-299:0.1149434140,Vmn1r13/1-  
299:0.1070876132)0.9998500075:0.0206831686)0.9998500075:0.0123420514,((Vmn1r24/1-  
296:0.0957908258,(Vmn1r26/1-293:0.1001537710,(Vmn1r22/1-301:0.0353979201,Vmn1r23/1-  
301:0.0414018059)0.9998500075:0.0804382729)0.9736143814:0.0160659805)0.9998500075:0.034449  
8054,(Vmn1r11/1-299:0.0566242484,((Vmn1r32/1-301:0.0234952540,(Vmn1r33/1-301:0.1073045025,  
(Vmn1r35/1-296:0.0228412047,Vmn1r36/1-  
301:0.0557841404)0.9998500075:0.0446231080)0.9936102676:0.0166012547)0.9998500075:0.050060  
1968,((Vmn1r5/1-301:0.0575287419,Vmn1r6/1-301:0.0421086642)0.9998500075:0.0524427340,  
(Vmn1r4/1-297:0.1203276224,((Vmn1r16/1-301:0.0520459010,Vmn1r29/1-  
301:0.0515510214)0.9998500075:0.0460030266,(((Vmn1r9/1-299:0.0098970805,Vmn1r10/1-  
301:0.0094544322)0.9998500075:0.0510150744,(Vmn1r7/1-301:0.0289307896,Vmn1r8/1-  
301:0.0108271055)0.9998500075:0.0631200927)0.9998500075:0.0484297703,((Vmn1r20/1-  
301:0.0107376297,Vmn1r27/1-301:0.0180417531)0.9998500075:0.0745474642,(Vmn1r17/1-  
301:0.0309862887,Vmn1r31/1-  
301:0.0588671773)0.9998500075:0.0289385998)0.9998500075:0.0328616990)0.9951658114:0.0190668  
313)0.9949974162:0.0124829298)0.9652484268:0.0105926548)0.9998500075:0.0190258743)0.992920  
4451:0.0114110023)0.9886157084:0.0105001440)0.9998500075:0.0154816620)0.8932340636:0.013968  
4537)0.9978461493:0.0579032907)0.9998500075:0.3640996211,(Vmn1r1/1-304:0.3679369850,  
((Vmn1r44/1-308:0.0535305593,((Vmn1r50/1-308:0.1142742902,Vmn1r49/1-  
308:0.0671978362)0.9968118880:0.0246717104,(Vmn1r40/1-308:0.0673862500,Vmn1r41/2-  
309:0.0872604981)0.9998500075:0.0221614664)0.9852456606:0.0225887811)0.9998500075:0.2235809

830,(Vmn1r54/17-323:0.3475958613,((Vmn1r47/1-308:0.0320841002,Vmn1r48/1-300:0.0104933483)0.9998500075:0.0411096305,(Vmn1r42/17-324:0.1153081750,Vmn1r45/17-316:0.0377336451)0.9985729479:0.0259346546)0.9998500075:0.1790324556)0.7767390342:0.0292059777)0.9998500075:0.1523791491)0.9998500075:0.2426540969)0.9998500075:0.3253116497)0.9818065400:0.1092591600,((Vmn1r87/1-288:0.4828944499,(Vmn1r85/2-301:0.2928330140,(Vmn1r89/1-309:0.0746982445,(Vmn1r86/1-309:0.0291067254,Vmn1r88/1-309:0.1032059548)0.9954634696:0.0272135454)0.9998500075:0.2164004518)0.9998500075:0.1437659227)0.9998500075:0.3829634951,((Vmn1r172/1-313:0.2137555411,(((Vmn1r56/1-296:0.0450108462,(Vmn1r57/1-296:0.0350934369,(Vmn1r59/1-296:0.0407726420,(Vmn1r58/1-296:0.0271247706,((Vmn1r62/1-296:0.0120758336,Vmn1r63/1-296:0.0222052210)0.9856152610:0.0034983179,(Vmn1r60/1-296:0.0170367987,Vmn1r61/1-296:0.0530722375)0.9998500075:0.0196012873)0.9998500075:0.0150310534)0.9998500075:0.0450062711)0.9647578952:0.0092821054)0.9998500075:0.0260535361)0.9998500075:0.2115403845,(Vmn1r171/13-316:0.0073850505,(Vmn1r176/1-304:0.0692301808,Vmn1r175/1-304:0.0250728337)0.9024098068:0.0206400442)0.9998500075:0.1562476135)0.8594804693:0.0329554522,((Vmn1r90/1-309:0.0413912181,(Vmn1r168/1-309:0.0153415262,Vmn1r177/1-309:0.0120307345)0.9998500075:0.0373887750)0.9998500075:0.1782642326,(Vmn1r178/1-304:0.0965793663,((Vmn1r181/1-304:0.0533991160,Vmn1r182/1-305:0.0924727105)0.9998500075:0.0482845715,((Vmn1r102/1-313:0.0090525495,(Vmn1r93/1-313:0.0000001141,Vmn1r126/1-313:0.0106454392)0.9998500075:0.0070162165)0.9998500075:0.0713590280,(((Vmn1r98/1-307:0.0054474407,Vmn1r119/1-307:0.0054408523)0.9943159346:0.0030313337,(Vmn1r101/1-307:0.0245356007,Vmn1r92/1-307:0.0083656529)0.9998500075:0.0081955843)0.9998500075:0.0103530367,(Vmn1r105/1-307:0.0180238573,(Vmn1r96/1-307:0.0146237894,Vmn1r129/1-307:0.0155265248)0.6431292273:0.0047410986)0.9998500075:0.0222575235)0.9998500075:0.0488097658,(((Vmn1r94/1-305:0.0110527150,Vmn1r127/1-305:0.0082112562)0.9659020594:0.0027389874,(Vmn1r103/1-305:0.0166547418,(Vmn1r99/1-305:0.0028097181,Vmn1r120/1-305:0.0193618595)0.9998500075:0.0223051506)0.9998500075:0.0084387637)0.9998500075:0.0229849297,(Vmn1r123/1-307:0.0354905487,(((Vmn1r109/1-297:0.0199108126,(Vmn1r100/1-307:0.0032567378,(Vmn1r125/1-307:0.0087014451,(Vmn1r128/1-307:0.0164217451,(Vmn1r95/1-307:0.0027174720,Vmn1r104/1-307:0.0108821596)0.9790247256:0.0026942667)0.9998500075:0.0159186680)0.9974158484:0.0054392496)0.9998500075:0.0049070602)0.9877068075:0.0030420996,(Vmn1r91/1-307:0.0167669732,Vmn1r124/1-307:0.0303099935)0.9998500075:0.0109573762)0.9998500075:0.0180806942,(Vmn1r106/1-306:0.0256004032,(Vmn1r97/1-306:0.0034836168,Vmn1r108/1-

306:0.0074668079)0.9998500075:0.0240500920)0.9998500075:0.0211584355)0.9998500075:0.0101404780)0.9837921156:0.0090363142)0.9998500075:0.0145877047)0.9998500075:0.0244384241)0.9998500075:0.0262089835)0.1964229356:0.0137875032)0.9998500075:0.1685808970)0.9344788967:0.0414458475)0.9958328581:0.0762571595)0.9998500075:0.8122053460,((Vmn1r82/1-304:0.2346002096,(Vmn1r84/13-318:0.3404437137,(Vmn1r78/3-310:0.1514934665,((Vmn1r81/3-306:0.0987251292,Vmn1r83/3-306:0.0744502212)0.9998500075:0.0589657392,((Vmn1r75/3-305:0.1379910580,(Vmn1r73/1-303:0.1726011144,(Vmn1r76/21-324:0.0973240785,(Vmn1r74/1-304:0.1152668020,Vmn1r80/1-308:0.0737085091)0.4727186922:0.0097204351)0.9998500075:0.0552372772)0.6567833024:0.0062914913)0.7867835858:0.0173923993,(Vmn1r77/3-306:0.1880005519,(Vmn1r79/3-306:0.0000000001,(Vmn1r2/3-306:0.0141274731,Vmn1r3/3-306:0.0084845421)0.9998500075:0.0056334144)0.9998500075:0.1223774570)0.9998500075:0.0655080654)0.9998500075:0.0277914315)0.9990517648:0.0352098535)0.9998500075:0.1625338603)0.9980246235:0.0607966432)0.9998500075:0.2821296737,(((Vmn1r227/1-306:0.2189809497,(Vmn1r228/31-333:0.1441562138,Vmn1r232/46-351:0.1291740381)0.9672893531:0.0414372148)0.9998500075:0.1884860397,(Vmn1r224/1-298:0.3242896062,((Vmn1r66/6-310:0.1965625953,(Vmn1r67/1-305:0.1648433886,(Vmn1r68/15-319:0.0683106813,Vmn1r69/15-319:0.0545759492)0.9998500075:0.1147077739)0.9778973356:0.0262565747)0.9998500075:0.0412009514,(Vmn1r71/1-307:0.2170029431,(Vmn1r184/5-312:0.0564783864,Vmn1r185/6-313:0.0409568211)0.9998500075:0.1837617072)0.9998500075:0.0708771047)0.9998500075:0.1363668492)0.6382194316:0.0314257888)0.9998500075:0.1823405606,(Vmn1r234/24-329:0.4202983084,Vmn1r237/1-289:0.2622186627)0.9998500075:0.1278761111)0.9998500075:0.1695444723)0.9536314793:0.0946716591)0.9998500075:0.1749320407)0.8827857700:0.0976590235)0.9998500075:0.2571863956)0.9998500075:0.1971083531)0.9998500075:0.0824612660,((LC-V1R11-g13453/2-306:0.5094854109,(LC-V1R12-JH127167-62652-63599/1-307:0.3543450500,((LC-V1R13-g01824/1-307:0.2098836459,LC-V1R14-g02196/1-307:0.1452640638)0.9451573690:0.0254390077,((LC-V1R15-JH132386-1786-2700/1-299:0.0187769964,LC-V1R16-g00870/2-306:0.0353416568)0.9998500075:0.2231965550,(LC-V1R17-g00958/2-306:0.0635069471,(LC-V1R18-g00627/2-306:0.0252269692,LC-V1R19-JH129249-102462-103379/1-300:0.1624446306)0.9998500075:0.1007316348)0.9998500075:0.1936552369)0.9998500075:0.2560067997)0.9991481052:0.0590118198)0.9998500075:0.0879918245)0.9998500075:0.1256091397,(((LC-V1R08-JH126576-3899564-3900517/1-305:0.4309083460,(LC-V1R09-JH126576-3966530-3967480/1-305:0.0936824172,LC-V1R10\_JH126576-3956453-3957412/1-306:0.0980134093)0.9998500075:0.1391193264)0.9815662521:0.0535146681,(Xt\_ORA12/1-308:0.3870049181,(Xt\_ORA11/1-203:0.4741998587,((Xt\_ORA10/1-306:0.0976172529,(Xt\_ORA9/1-

309:0.0667287639,Xt\_ORA8/2-  
307:0.0536666318)0.9944189458:0.0317394900)0.9998500075:0.1566216355,(Xt\_ORA7/1-  
303:0.2145375564,(Xt\_ORA13/1-310:0.4292760553,(Xt\_ORA6/16-321:0.2255586176,(Xt\_ORA2/1-  
306:0.0000006663,(Xt\_ORA5/100-405:0.0423263167,(Xt\_ORA3/1-283:0.0093074736,Xt\_ORA4/1-  
306:0.0473048831)0.9998500075:0.0168786753)0.9998500075:0.0359822185)0.9998500075:0.157183  
8228)0.9998500075:0.0573460003)0.9955751782:0.0271449577)0.9990945378:0.0372537859)0.69493  
84880:0.0721555293)0.9998500075:0.1134169091)0.9998500075:0.1567042044)0.9998500075:0.18569  
71104,(LC-V1R07-g18654/1-307:0.3024141840,(LC-V1R02-g18669/2-309:0.2610135486,(Dr\_ORA2/1-  
301:0.3567305545,(OI\_ORA2:0.2311281364,(Ga\_ORA2/1-305:0.1417865184,  
(Tn\_ORA2:0.0913400963,Tr\_ORA2:0.0464929181)0.9998500075:0.1155857952)0.9051379923:0.03875  
94650)0.7319420337:0.0483282812)0.9998500075:0.3654060128)0.9998500075:0.1724694439)0.9931  
618418:0.0637175510)0.9998500075:0.0644630965)0.9434175942:0.0602583371)0.9998500075:0.390  
0067360)0.9998500075:0.2390912256)0.8507682672:0.0926918176)0.8586983343:0.1354216159)0.99  
98500075:0.3914441513)0.4219211871:0.0848933637)0.8771592670:0.0781197942)0.9497968092:0.07  
16360678,((LC\_T2R02\_JH128442-389500-390500/1-290:0.5438420463,  
(LC\_T2R03\_ENSLACG00000000459/5-293:0.3606516550,LC\_T2R04\_ENSLACG00000005021/1-  
297:0.3297282562)0.9998500075:0.3507349448)0.9998500075:0.2641769056,  
((LC\_T2R07\_ENSLACG00000000429/1-296:0.0874511966,(LC\_T2R08\_JH130784-23237-24160/1-  
300:0.1393603167,(LC\_T2R09\_ENSLACG00000003709/9-308:0.0657440966,  
(LC\_T2R10\_ENSLACG00000002588/1-301:0.0461297376,(LC\_T2R12\_JH130784-b58450-b59400/4-  
304:0.0482327009,LC\_T2R11\_ENSLACG00000000516/1-  
297:0.0187790059)0.9998500075:0.0113812452)0.9998500075:0.0385968711)0.9998500075:0.0367074  
197)0.9938009396:0.0281784928)0.9998500075:0.2650220881,  
(((LC\_T2R06\_ENSLACG00000000717/1-298:0.1729165304,LC\_T2R05\_ENSLACG00000002015/1-  
302:0.3884434864)0.9998500075:0.0739596212,(LC\_T2R13\_JH130976-3613-4524/1-  
301:0.3079661889,((LC\_T2R14\_g02292/13-312:0.0297769995,LC\_T2R15\_JH129824-107559-108476/1-  
300:0.0191366820)0.9998500075:0.0435393963,((LC\_T2R16\_g02330/13-  
312:0.0263963155,LC\_T2R17\_g02899/1-300:0.0231022472)0.9998500075:0.0254163739,  
(LC\_T2R18\_JH131589-29724-30617/9-295:0.0697563605,LC\_T2R19-124199-125143/1-  
300:0.0158576479)0.9998500075:0.0286694575)0.4975738928:0.0162428475)0.9998500075:0.368162  
3688)0.9946076484:0.0406660497)0.8336642436:0.0410956625,((LC\_T2R20\_g00491/11-  
312:0.0491719541,LC\_T2R21\_g05130/13-305:0.0025899078)0.9998500075:0.1716038016,  
((LC\_T2R22\_JH129648-127088-127993/1-298:0.1826205054,LC\_T2R23\_ENSLACG00000001021/1-  
291:0.2776269152)0.9998500075:0.0738591837,(LC\_T2R24\_ENSLACG00000001744/4-  
304:0.2578330282,((LC\_T2R25\_JH129648-116200-117050/1-299:0.1570825098,  
(LC\_T2R26\_JH130917-46105-46999/1-296:0.1061386018,(LC\_T2R27\_ENSLACG00000001874/1-  
301:0.1769913626,((LC\_T2R28\_g06895/1-301:0.0905853542,Lc\_T2R29\_JH128085-30766-31662/1-

296:0.0796232509)0.9998500075:0.1392743943,(LC\_T2R30\_ENSLACG00000001246/1-  
300:0.0759321856,(LC\_T2R31\_JH128085-329000-329900/1-303:0.0481266071,LC\_T2R32\_JH128085-  
412667-413584/1-  
302:0.0930365250)0.8332724751:0.0134221100)0.9998500075:0.1299614931)0.9998500075:0.0449467  
295)0.9998500075:0.0414526907)0.9998500075:0.1090341758)0.9985025540:0.0480894639,  
(((LC\_T2R33\_g01751/1-294:0.1602040477,((LC\_T2R34\_JH129988-117000-119000/1-  
295:0.0815883961,LC\_T2R35\_ENSLACG00000000678/13-  
302:0.0717128781)0.9998500075:0.0754846922,(LC\_T2R36\_g01331/1-  
296:0.0672338653,LC\_T2R37\_JH129988-167404-168291/1-  
295:0.0747134713)0.9998500075:0.0722779241)0.9880052695:0.0350972021)0.9998500075:0.222578  
4555,(LC\_T2R38\_ENSLACG00000000317/13-304:0.1945327194,(LC\_T2R39\_g01372/11-  
302:0.2115636487,LC\_T2R40\_ENSLACG00000002445/1-  
301:0.2157127117)0.9992448797:0.0422334636)0.9998500075:0.1161984128)0.9998500075:0.0980602  
648,(LC\_T2R41\_JH130077-122561-123463/1-  
298:0.0455205165,LC\_T2R42\_ENSLACG00000006135/4-  
294:0.0159460994)0.9998500075:0.1948524874,((LC\_T2R43\_JH132281-3349-42091/1-  
284:0.0427961296,LC\_T2R44\_ENSLACG00000005213/2-  
297:0.0161055169)0.9998500075:0.2264536339,(((LC\_T2R45\_ENSLACG00000002953/2-  
297:0.1924104697,(LC\_T2R46\_JH132617-3356-4267/1-301:0.1011351041,(LC\_T2R47\_JH134280-  
2000-3700/1-301:0.0192549555,LC\_T2R48\_JH131192-13968-14870/1-  
298:0.0877459416)0.9998500075:0.0382600588)0.9998500075:0.2228467368)0.9998500075:0.060716  
6728,(LC\_T2R49\_g03496/1-298:0.3550123034,(LC\_T2R50\_JH135454-2600-3600/1-  
298:0.1593226990,LC\_T2R51\_JH130976-56756-57640/1-  
293:0.0513476091)0.9998500075:0.0873911273)0.9990684779:0.0569047827)0.9998500075:0.0988790  
491,((LC\_T2R52\_ENSLACG00000002071/2-300:0.0238464334,LC\_T2R53\_ENSLACG00000002046/1-  
294:0.0014817312)0.9998500075:0.1178236468,((LC\_T2R54\_JH130641-11547-12443/1-  
296:0.0111576799,Lc\_T2R55\_JH130827-7169-8065/1-294:0.0650336000)0.9998500075:0.0639817088,  
(LC\_T2R56\_ENSLACG00000001061/14-305:0.2001696710,LC\_T2R57-AFYH01284138-450-1400/1-  
296:0.1060967258)0.9998500075:0.0356116258)0.9998500075:0.1244549694)0.8636328556:0.0243862  
984)0.9998500075:0.0817106275,(LC\_T2R58\_g06318/2-295:0.1982464456,  
((LC\_T2R63\_ENSLACG00000002255/3-302:0.2805577997,LC\_T2R64\_ENSLACG00000003395/1-  
296:0.1325898332)0.9998500075:0.1856375380,((LC\_T2R60\_JH128916-233505-234389/1-  
294:0.1774338232,(LC\_T2R61\_JH128916-195708-196628/1-300:0.0557028439,Lc\_T2R62\_JH129837-  
106889-107800/1-297:0.0470603442)0.9998500075:0.1073746441)0.9998500075:0.0635388340,  
(LC\_T2R59\_JH128916-126493-127395/1-296:0.1988111591,(((LC\_T2R68\_JH129750-41217-42131/1-  
300:0.0147140432,LC\_T2R69\_ENSLACG00000003809/1-  
300:0.0351695026)0.9998500075:0.0683722006,((LC\_T2R70\_JH129303-210000-211000/1-

298:0.1007410726,LC\_T2R71\_ENSLACG00000003104/2-  
301:0.1087302132)0.9998500075:0.0729803060,((LC\_T2R72\_JH129303-64562-65465/1-  
297:0.1046414724,(LC\_T2R73\_JH129303-155997-156905/4-301:0.0563682333,LC\_T2R74\_g01418/1-  
295:0.0574331928)0.9944099307:0.0391532156)0.9921407445:0.0453540276,(LC\_T2R75\_JH129303-  
138585-139493/2-300:0.0655458514,LC\_T2R76\_ENSLACG00000007023/1308/1-  
300:0.0583549065)0.9998500075:0.0390685899)0.8636269225:0.0223374627)0.9998500075:0.034318  
1311)0.9998500075:0.0500044719,((LC\_T2R65\_JH131022\_JH1310226900-7950/1-298:0.0866603704,  
(LC\_T2R66\_JH128085-553378-554280/1-298:0.0880937982,LC\_T2R67\_ENSLACG00000002847/21-  
321:0.0982410740)0.9579907740:0.0145478743)0.9998500075:0.1030665200,((LC\_T2R77\_g03692/2-  
295:0.0482303432,LC\_T2R78\_g07306/2-292:0.0601651143)0.9998500075:0.1117312779,  
(LC\_T2R79\_ENSLACG00000003761/4-300:0.1090817943,LC\_T2R80\_JH128916-42068-43018/1-  
298:0.2561175850)0.9998500075:0.0350922020)0.9998500075:0.0348920757)0.9929746850:0.0229672  
452)0.9998500075:0.0378201760)0.9921686801:0.0224180492)0.2139784204:0.0107735547)0.999850  
0075:0.0412249322)0.9985106044:0.0372263032)0.9998500075:0.0258295111)0.9998500075:0.069585  
9488)0.9998500075:0.1886715326)0.9998500075:0.0357617226)0.9998500075:0.0398151067)0.43350  
41674:0.0271590727)0.9998500075:0.0401050970)0.9998500075:0.0847427775)0.9998500075:0.1098  
686526)0.9998500075:0.4153742365)0.9039926935:0.0985613767)0.9998500075:0.2380142825)0.998  
7257097:0.0827871811)0.9998500075:0.1527602807)0.9998500075:0.9337756594)0.6950113924:0.052  
6770126)0.9998500075:0.3822693929);

#### Part 4 Tree file in Newick format for T2R and V1R sequences shown in Fig. 2.

(Frog\_T2R24--Intact\_1/1-264:0.0000002264,Frog\_T2R25--Intact\_1/1-264:0.0033918876,(Frog\_T2R46--Intact\_1/1-265:0.3244729492,((Frog\_T2R27--Intact\_1/1-266:0.2599625400,Frog\_T2R28--Intact\_1/1-257:0.4376057685)0.8870291968:0.0625733451,(((Mouse\_T2R138--Intact\_1/1-287:0.8612148069,(((Mouse\_T2R115--Intact\_1/1-281:0.4150458937,((Mouse\_T2R110--Intact\_1/6-297:0.0987915022,Mouse\_T2R123--Intact\_1/6-297:0.1048446294)0.9998500075:0.2998708539,(Mouse\_T2R116--Intact\_1/1-283:0.3544824036,((Mouse\_T2R140--Intact\_1/1-284:0.2265421711,Mouse\_T2R33--Intact\_1/1-285:0.3567211527)0.9998500075:0.1044054501,(Mouse\_T2R129--Intact\_1/1-279:0.4230826603,(Mouse\_T2R109--Intact\_1/1-284:0.1622910546,Mouse\_T2R117--Intact\_1/1-285:0.1910237582)0.9998500075:0.2045263092)0.9998500075:0.1007780975)0.9804359879:0.0524134258)0.9296416960:0.0455409258)0.9473144087:0.0604756598)0.9998500075:0.0996017303,((Mouse\_T2R102--Intact\_1/1-282:0.3658903576,Mouse\_T2R121--Intact\_1/1-277:0.2531435025)0.9998500075:0.1945241555,(Mouse\_T2R120--Intact\_1/1-270:0.3122862773,Mouse\_T2R136--Intact\_1/1-282:0.5108217758)0.9998500075:0.2574453838)0.9117966713:0.0609282666)0.9998500075:0.1612137430,(Mouse\_T2R131--Intact\_1/1-276:0.7555573328,((Mouse\_T2R130--Intact\_1/1-282:0.4268849725,(Mouse\_T2R106--Intact\_1/1-285:0.2887544561,(Mouse\_T2R107--Intact\_1/1-283:0.2835983267,Mouse\_T2R105--Intact\_1/1-278:0.2522530118)0.9916686581:0.0692464803)0.9998500075:0.3343427037)0.9369605795:0.0521811097,(Mouse\_T2R137--Intact\_1/1-283:0.5823961833,Mouse\_T2R122--Intact\_1/1-280:0.6326662260)0.9387415686:0.0979965175)0.9822908464:0.0478860042)0.7210801157:0.0564103504)0.9998500075:0.2470113286)0.9974379881:0.1052243949,((Mouse\_T2R144--Intact\_1/1-273:0.4106612910,Mouse\_T2R139--Intact\_1/1-269:0.4481781038)0.9998500075:0.3418388627,((Mouse\_T2R118--Intact\_1/1-272:0.6615004244,(Mouse\_T2R19--Intact\_1/1-271:0.2155900159,Mouse\_T2R143--Intact\_1/1-272:0.2751339249)0.9998500075:0.2530864526)0.9998500075:0.2238310610,(Mouse\_T2R126--Intact\_1/1-279:0.4288574979,Mouse\_T2R135--Intact\_1/1-275:0.7656949928)0.9998500075:0.1724371662)0.9998500075:0.3089406733)0.9906939019:0.0930939927)0.9998500075:0.1282194928,((Frog\_T2R1--Intact\_1/1-287:0.3510779989,Frog\_T2R29--Intact\_1/10-284:0.3183371215)0.9998500075:0.5895760922,((Frog\_T2R26--Intact\_1/1-277:0.3608410142,(Frog\_T2R7--Intact\_1/1-269:0.0000028659,(Frog\_T2R47--Intact\_1/1-269:0.0000002107,Frog\_T2R6--Intact\_1/1-269:0.0925107661)0.9329005514:0.0191467137)0.9998500075:0.5181170213)0.9998500075:0.2971507

864,(Frog\_T2R31--Intact\_1/1-268:0.9432331625,(Frog\_T2R4--Intact\_1/1-264:0.5292968107,  
(Frog\_T2R5--Intact\_1/2-276:0.4452445211,Frog\_T2R48--Intact\_1/1-  
276:0.7105934744)0.9793655660:0.1044632915)0.9998500075:0.3252907061)0.6563109063:0.051033  
3140)0.9998500075:0.1117206212)0.8673286692:0.0296372284)0.8137837545:0.0554855079,  
((Frog\_T2R30--Intact\_1/1-282:0.8272648301,(Frog\_T2R8--Intact\_1/1-264:1.0199302889,(Frog\_T2R23--  
Intact\_1/1-262:0.6899544419,Frog\_T2R3--Intact\_1/1-  
276:0.7798721483)0.9985338407:0.1952288827)0.9072052983:0.0973268139)0.9998500075:0.173352  
5408,((((((Frog\_T2R49--Intact\_1/1-281:0.0299816200,(Frog\_T2R12--Intact\_1/1-  
283:0.0173398816,Frog\_T2R2--Intact\_1/1-  
292:0.0351097668)0.9998500075:0.0377564572)0.9998500075:0.2187163195,(Frog\_T2R36--Intact\_1/1-  
280:0.1157335647,(Frog\_T2R35--Intact\_1/1-283:0.0920338546,(Frog\_T2R34--Intact\_1/1-  
274:0.1182698262,Frog\_T2R9--Intact\_1/1-  
283:0.0705768125)0.9998500075:0.0670300030)0.9998500075:0.0425922766)0.9068766681:0.036843  
4662)0.9998500075:0.2424215387,(Frog\_T2R42--Intact\_1/1-291:0.3789200934,(Frog\_T2R40--  
Intact\_1/1-284:0.1387220718,(Frog\_T2R38--Intact\_1/1-283:0.1470968205,(Frog\_T2R22--Intact\_1/1-  
283:0.0499817398,Frog\_T2R33--Intact\_1/1-  
285:0.0437672686)0.9998500075:0.1442197664)0.9998500075:0.0506431638)0.9998500075:0.271623  
1439)0.3489861944:0.0160885373)0.9998500075:0.0795845681,((Frog\_T2R11--Intact\_1/1-  
288:0.1050094223,(Frog\_T2R10--Intact\_1/1-284:0.0295313122,Frog\_T2R32--Intact\_1/1-  
284:0.0758918865)0.9998500075:0.1040340316)0.9998500075:0.2634336645,(Frog\_T2R39--Intact\_1/1-  
285:0.1451722830,(Frog\_T2R37--Intact\_1/1-287:0.1313889101,Frog\_T2R41--Intact\_1/1-  
287:0.1546973339)0.9908442764:0.0365337228)0.9998500075:0.2693605432)0.9524055806:0.070190  
8914)0.9998500075:0.7247662569,((Frog\_T2R43--Intact\_1/1-279:0.0276156267,(Frog\_T2R44--  
Intact\_1/1-279:0.0762978677,Frog\_T2R45--Intact\_1/1-  
283:0.1242370242)0.9998500075:0.0807449944)0.9998500075:0.6281820276,((Frog\_T2R20--  
Intact\_1/1-287:0.3367721774,(Frog\_T2R17--Intact\_1/1-267:0.1836411932,(Frog\_T2R13--Intact\_1/1-  
284:0.1429331211,Frog\_T2R15--Intact\_1/1-  
286:0.1908147297)0.9988383537:0.0622540761)0.9998500075:0.2489369796)0.9998500075:0.580226  
5024,((Frog\_T2R14--Intact\_1/1-279:0.2509771371,(Frog\_T2R18--Intact\_1/21-  
297:0.0494714498,Frog\_T2R19--Intact\_1/1-  
260:0.0303239435)0.9998500075:0.1444025520)0.9998500075:0.2125366467,(Frog\_T2R16--Intact\_1/1-  
267:0.4952301394,Frog\_T2R21--Intact\_1/1-  
274:0.6604838105)0.9776221557:0.1364395644)0.9998500075:0.2881570838)0.9998500075:0.216352  
0704)0.7776615141:0.0984982343)0.4476848763:0.0280234836,(((Fugu\_T2R2--Intact\_1/1-  
281:0.6132557313,(Zebrafish\_T2R1--Intact\_1/1-293:0.0574349317,Zebrafish\_T2R2--Intact\_1/11-  
304:0.1261576988)0.9998500075:0.3243151406)0.9998500075:0.9257419205,  
((LC\_T2R01\_g03562\_fishlike/1-292:0.4385990364,(Stickleback\_T2R3--Intact\_1/1-303:0.0791503986,

(Fugu\_T2R1--Intact\_1/1-302:0.0869870169,Pufferfish\_T2R1--Intact\_1/1-302:0.1825167872)0.9998500075:0.1475367072)0.9998500075:0.5454529512)0.9998500075:0.7470701070,(Zebrafish\_T2R3--Intact\_1/1-278:0.6597843260,(Zebrafish\_T2R4--Intact\_1/3-272:0.9018007676,((Fugu\_T2R4--Intact\_1/1-263:0.3698918948,Pufferfish\_T2R6--Intact\_1/1-260:0.2518950626)0.9998500075:0.5707499799,((Stickleback\_T2R1--Intact\_1/3-272:0.0735748762,Stickleback\_T2R2--Intact\_1/3-268:0.0278038677)0.9998500075:0.4303115318,(Fugu\_T2R3--Intact\_1/3-269:0.2505449509,(Pufferfish\_T2R3--Intact\_1/3-268:0.1928170449,(Pufferfish\_T2R4--Intact\_1/1-266:0.0817819622,(Pufferfish\_T2R2--Intact\_1/1-269:0.0244307538,Pufferfish\_T2R5--Intact\_1/1-269:0.0254920824)0.9998500075:0.1391987942)0.9998500075:0.0652164303)0.9998500075:0.1539939690)0.9998500075:0.2126456684)0.9998500075:0.2688511494)0.9669210246:0.0978596136)0.9767203407:0.1183212442)0.9998500075:0.8027202107)0.6524222508:0.0700574430)0.9256339886:0.1224284761,((LC\_T2R02\_JH128442-389500-390500/1-287:0.5919641727,(LC\_T2R03\_ENSLACG00000000459/5-289:0.3529263945,LC\_T2R04\_ENSLACG000000005021/1-292:0.2907779392)0.9998500075:0.4349795895)0.9998500075:0.1843612242,(LC\_T2R05\_ENSLACG00000002015/1-302:0.3297067428,(LC\_T2R06\_ENSLACG00000000717/1-297:0.1804097940,((LC\_T2R07\_ENSLACG00000000429/1-295:0.0864375690,(LC\_T2R08-r\_JH130784-23237-24160/1-299:0.1292119929,(LC\_T2R09\_ENSLACG00000003709/9-307:0.0632866935,(LC\_T2R10\_ENSLACG00000002588/1-300:0.0451538179,(LC\_T2R11\_ENSLACG00000000516/1-296:0.0183791268,LC\_T2R12\_JH130784-b58450-b59400/4-303:0.0470670107)0.9998500075:0.0109042506)0.9998500075:0.0397194455)0.9991873003:0.0362714749)0.9358963985:0.0267032814)0.9998500075:0.3365818215,((LC\_T2R13\_JH130976-3613-4524/1-300:0.3070308455,((LC\_T2R14\_g02292/13-312:0.0289168699,LC\_T2R15\_JH129824-107559-108476/1-300:0.0186604016)0.9998500075:0.0416612994,((LC\_T2R16\_g02330/13-312:0.0257659952,LC\_T2R17\_g02899/1-300:0.0222969243)0.9998500075:0.0245928735,(LC\_T2R18\_JH131589-29724-30617/9-294:0.0675650722,LC\_T2R19-124199-125143/1-300:0.0154652652)0.9998500075:0.0281562755)0.3032687553:0.0163665249)0.9998500075:0.3646985846)0.9909907968:0.0370578107,((LC\_T2R20\_g00491/11-310:0.0469882582,LC\_T2R21\_g05130/13-304:0.0030171745)0.9998500075:0.1627111116,((LC\_T2R22\_JH129648-127088-127993/1-300:0.1747709926,LC\_T2R23\_ENSLACG00000001021/1-290:0.2764590245)0.9998500075:0.0713104869,(LC\_T2R24\_ENSLACG00000001744/4-304:0.2534522961,((LC\_T2R25\_JH129648-116200-117050/1-297:0.1600651602,(LC\_T2R26\_JH130917-46105-46999/1-295:0.1042439784,(LC\_T2R27\_ENSLACG00000001874/1-300:0.1630784674,((LC\_T2R28\_g06895/1-299:0.0878065142,LC\_T2R29\_JH128085-30766-31662/1-295:0.0765555986)0.9998500075:0.1286341710,(LC\_T2R30\_ENSLACG00000001246/1-299:0.0723310449,(LC\_T2R31\_JH128085-329000-329900/1-300:0.0481077861,LC\_T2R32\_JH128085-412667-413584/1-

299:0.0930470872)0.9449286383:0.0148181688)0.9998500075:0.1209767063)0.9998500075:0.046450  
0873)0.9998500075:0.0394929695)0.9998500075:0.0931800935)0.9998500075:0.0469522097,  
(((LC\_T2R33\_g01751/1-294:0.1580192460,((LC\_T2R34\_JH129988-117000-119000/1-  
295:0.0790185626,LC\_T2R35\_ENSLACG00000000678/13-  
302:0.0684089244)0.9998500075:0.0741050618,(LC\_T2R36\_g01331/1-  
297:0.0645545122,LC\_T2R37\_JH129988-167404-168291/1-  
295:0.0721536692)0.9998500075:0.0673071302)0.9876579378:0.0330008929)0.9998500075:0.216258  
6537,(LC\_T2R38\_ENSLACG00000000317/13-303:0.1822088658,(LC\_T2R39\_g01372/11-  
301:0.2046444232,LC\_T2R40\_ENSLACG000000002445/1-  
301:0.2124071906)0.9988822015:0.0406950753)0.9998500075:0.1128563153)0.9998500075:0.0961676  
211,((LC\_T2R41\_JH130077-122561-123463/1-  
297:0.0424660428,LC\_T2R42\_ENSLACG000000006135/4-  
293:0.0143747203)0.9998500075:0.1921306702,((LC\_T2R43\_JH132281-3349-42091/1-  
283:0.0413513239,LC\_T2R44\_ENSLACG000000005213/2-  
296:0.0161512404)0.9998500075:0.2213721895,(((LC\_T2R45\_ENSLACG000000002953/2-  
296:0.1895152970,(LC\_T2R46\_JH132617-3356-4267/1-299:0.1004729088,(LC\_T2R47\_JH134280-  
2000-3700/1-299:0.0185803549,LC\_T2R48\_JH131192-13968-14870/1-  
296:0.0872585676)0.9998500075:0.0367990437)0.9998500075:0.2113378609)0.9998500075:0.0591262  
848,(LC\_T2R49\_g03496/1-300:0.3438861481,(LC\_T2R50\_JH135454-2600-3600/1-  
295:0.1511502456,LC\_T2R51\_JH130976-56756-57640/1-  
292:0.0490532745)0.9998500075:0.0885755659)0.9938065021:0.0463101885)0.9998500075:0.093454  
5582,((LC\_T2R52\_ENSLACG000000002071/2-301:0.0229632341,LC\_T2R53\_ENSLACG000000002046/1-  
293:0.0013143107)0.9998500075:0.1124191901,((LC\_T2R54\_JH130641-11547-12443/1-  
295:0.0109428000,Lc\_T2R55\_JH130827-7169-8065/1-293:0.0638314445)0.9998500075:0.0572051262,  
(LC\_T2R56\_ENSLACG000000001061/14-304:0.1897064198,LC\_T2R57-AFYH01284138-450-1400/1-  
295:0.1031690167)0.9998500075:0.0347557749)0.9998500075:0.1239290370)0.7342368583:0.023392  
2149)0.9998500075:0.0761066055,(LC\_T2R58\_g06318/2-294:0.1965316438,(LC\_T2R59\_JH128916-  
126493-127395/1-295:0.1961340514,((LC\_T2R60\_JH128916-233505-234389/1-293:0.1763913703,  
(Lc\_T2R61\_JH128916-195708-196628/1-299:0.0554555418,Lc\_T2R62\_JH129837-106889-107800/1-  
296:0.0452095784)0.9998500075:0.1081398499)0.9998500075:0.0575370598,  
((LC\_T2R63\_ENSLACG000000002255/3-302:0.2685466036,LC\_T2R64\_ENSLACG000000003395/1-  
295:0.1401749008)0.9998500075:0.1802666677,((LC\_T2R65\_JH131022\_JH1310226900-7950/1-  
297:0.0891894585,(LC\_T2R66\_JH128085-553378-554280/1-  
297:0.0857935224,LC\_T2R67\_ENSLACG000000002847/21-  
319:0.0970832888)0.7413427987:0.0105894874)0.9998500075:0.0979740923,(((LC\_T2R68\_JH129750-  
41217-42131/1-300:0.0144234751,LC\_T2R69\_ENSLACG000000003809/1-  
300:0.0343516777)0.9998500075:0.0642377312,((LC\_T2R70\_JH129303-210000-211000/1-

297:0.0957336846,LC\_T2R71\_ENSLACG00000003104/2-  
301:0.1053856875)0.9998500075:0.0672593022,((LC\_T2R72\_JH129303-64562-65465/1-  
296:0.1009076620,(LC\_T2R73\_JH129303-155997-156905/4-300:0.0559599606,LC\_T2R74\_g01418/1-  
294:0.0552175654)0.9965810479:0.0383443495)0.9914567671:0.0410884218,(LC\_T2R75\_JH129303-  
138585-139493/2-299:0.0638237132,LC\_T2R76\_ENSLACG00000007023/1308/1-  
300:0.0569957096)0.9998500075:0.0388665336)0.8968498631:0.0222643589)0.9998500075:0.034998  
8040)0.9998500075:0.0558306118,((LC\_T2R77\_g03692/2-294:0.0472445084,LC\_T2R78\_g07306/2-  
291:0.0583707446)0.9998500075:0.1083160654,(LC\_T2R79\_ENSLACG00000003761/4-  
299:0.1032237258,LC\_T2R80\_JH128916-42068-43018/1-  
298:0.2479923501)0.9986466810:0.0331618003)0.9998500075:0.0387142154)0.7134418367:0.014864  
8121)0.9998500075:0.0334328316)0.9196285222:0.0230334188)0.8889689453:0.0066205372)0.99985  
00075:0.0370058722)0.9998500075:0.0409882192)0.9950076293:0.0258306619)0.9998500075:0.0655  
325789)0.9998500075:0.1844516044)0.9985305260:0.0389475213)0.9998500075:0.0425943265)0.516  
8534148:0.0221038740)0.9998500075:0.0365085037)0.9998500075:0.0942397554)0.9915365280:0.05  
28703830)0.9946937185:0.0448536600)0.9199640692:0.0733186720)0.9998500075:0.3933329995)0.9  
938695461:0.1452443399)0.9998500075:0.2925871036)0.9986107237:0.0947908125)0.9998500075:0.  
1484348876)0.9998500075:0.9264217956)0.8325675189:0.0634882284)0.9998500075:0.3703017821);

## Part 5 Tree file in Newick format for T2R and V1R sequences shown in Fig. 3.

(Tn\_ORA6/1-274:0.0723508757,Tr\_ORA6/1-274:0.0556883993,(Ga\_ORA6/1-279:0.2991686178,  
(OI\_ORA6/1-267:0.3311611620,(Dr\_ORA6/1-271:0.4657094175,(LC-V1R06-JH127233-161522-  
162418/1-271:0.6036148467,((Dr\_ORA5/1-272:0.3090329600,(OI\_ORA5/1-276:0.2424578650,  
(Ga\_ORA5/1-276:0.1202849751,(Tn\_ORA5/1-276:0.0438863580,Tr\_ORA5/1-  
276:0.0784272507)0.9998500075:0.0744012656)0.6131671097:0.0376778491)0.9998500075:0.186903  
2519)0.9998500075:0.6464476045,(LC-V1R05-JH132282-2162-3064/1-288:1.0976355200,  
(((Pm\_Seq2/1-291:0.4508625953,((Dr\_ORA4/1-302:0.1271259818,(Ga\_ORA4/1-304:0.1159473055,  
(OI\_ORA4/1-306:0.1171404927,(Tn\_ORA4/1-303:0.0425557892,Tr\_ORA4/1-  
306:0.0271570701)0.9998500075:0.0639837369)0.9986198423:0.0274309327)0.9333401636:0.050526  
2868)0.9998500075:0.4826613930,(LC-V1R04-JH126562-9351125-9352069/1-291:0.5155202558,  
((Dr\_ORA3/14-309:0.2074971297,(OI\_ORA3/22-317:0.1329113576,(Ga\_ORA3/38-331:0.1013542757,  
(Tn\_ORA3/18-312:0.0510650474,Tr\_ORA3/20-  
315:0.0384099615)0.9998500075:0.0620046823)0.9998500075:0.0960520345)0.9956555058:0.081009  
7271)0.9998500075:0.3408357989,(LC-V1R03-JH126562-9337639-9338598/1-  
296:0.2699466062,Xt\_ORA15/1-  
290:0.5285490068)0.9998500075:0.1168869700)0.9935878895:0.0811746587)0.7622181333:0.0616582  
515)0.9985080143:0.1071481456)0.9998500075:0.3714679276,(Pm\_Seq3/29-  
298:1.0701172738,Pm\_Seq4/4-  
277:0.9234218796)0.6543355936:0.1279256372)0.9300504799:0.1288375071,(Pm\_Seq1/1-  
295:1.0099648534,(LC-V1R02-g18669/2-307:0.2557173550,(Dr\_ORA2/1-299:0.3560633098,  
(OI\_ORA2:0.2402654527,(Ga\_ORA2/1-303:0.1425624429,  
(Tn\_ORA2:0.0959926370,Tr\_ORA2:0.0472976064)0.9998500075:0.1108984838)0.8856725377:0.03412  
03966)0.9481716559:0.0597035292)0.9998500075:0.3685646708)0.9577202560:0.0874505557,(LC-  
V1R07-g18654/1-305:0.3060566256,(((LC-V1R08-JH126576-3899564-3900517/1-304:0.4328010479,  
(LC-V1R09-JH126576-3966530-3967480/1-304:0.0987021363,LC-V1R10\_JH126576-3956453-  
3957412/1-305:0.0923615432)0.9998500075:0.1444836694)0.9919266682:0.0499868587,(Xt\_ORA12/1-  
305:0.3946953274,(Xt\_ORA13/1-305:0.3887812397,((Xt\_ORA10/1-305:0.0935138433,(Xt\_ORA9/1-  
309:0.0703050012,Xt\_ORA8/2-  
310:0.0556103021)0.9998500075:0.0381433721)0.9998500075:0.1320874924,((Xt\_ORA6/16-  
320:0.2113119306,(Xt\_ORA2/1-305:0.0005341247,(Xt\_ORA5/100-404:0.0387133920,(Xt\_ORA3/1-  
282:0.0093730281,Xt\_ORA4/1-  
305:0.0467720908)0.9998500075:0.0168804645)0.9998500075:0.0355076735)0.9998500075:0.156686

6611)0.9998500075:0.0831198796,(Xt\_ORA11/1-203:0.5006639947,Xt\_ORA7/1-302:0.1724031260)0.8300370250:0.0344629407)0.9998500075:0.0484705497)0.8881500064:0.0701874234)0.9998500075:0.1369920133)0.9998500075:0.1401683079)0.9998500075:0.1772626764,((LC-V1R11-g13453/2-306:0.5124178961,(LC-V1R12-JH127167-62652-63599/1-305:0.3475570248,((LC-V1R13-g01824/1-305:0.2116315934,LC-V1R14-g02196/1-305:0.1415482785)0.9868942290:0.0294676668,((LC-V1R15-JH132386-1786-2700/1-296:0.0141683996,LC-V1R16-g00870/2-305:0.0356775263)0.9998500075:0.2167276768,(LC-V1R17-g00958/2-304:0.0604363990,(LC-V1R18-g00627/2-304:0.0243492288,LC-V1R19-JH129249-102462-103379/1-298:0.1573391493)0.9998500075:0.0976766452)0.9998500075:0.1895622681)0.9998500075:0.2294956009)0.9998500075:0.0608931502)0.9998500075:0.0916700631)0.9998500075:0.1273264606,((LC-V1R01-JH126576-3892974-3893936/1-303:0.3466896907,(LC-V1R01a-g18646/2-306:0.1302384955,(Xt\_ORA1/1-302:0.3330458332,(Dr\_ORA1:0.1456929731,(OI\_ORA1/1-302:0.0617918733,Ga\_ORA1/1-301:0.0714317881)0.9998500075:0.0730489916)0.9998500075:0.1188779578)0.9846869500:0.0523549069)0.9917444362:0.0515043193)0.9289253977:0.0608016460,(Xt\_ORA14/1-297:0.7007858137,(((Vmn1r87/1-285:0.4792637275,(Vmn1r85/2-300:0.2912781274,(Vmn1r89/1-306:0.0723560874,(Vmn1r86/1-306:0.0259951370,Vmn1r88/1-306:0.1031998438)0.9961572544:0.0256583832)0.9998500075:0.2177615533)0.9998500075:0.1552926322)0.9998500075:0.4150819770,(((Vmn1r195/1-305:0.2517977719,((Vmn1r216/3-297:0.0811790786,(Vmn1r193/20-318:0.0519904971,Vmn1r204/20-318:0.0691802920)0.9998500075:0.0366129581)0.9998500075:0.1329225258,(Vmn1r194/1-295:0.1937216777,Vmn1r215/1-299:0.1659140752)0.9998500075:0.0703225991)0.8199219115:0.0207231632)0.9998500075:0.2139339569,(Vmn1r211/1-297:0.2418752419,(Vmn1r196/1-299:0.2676358971,(Vmn1r200/1-301:0.0792464552,((Vmn1r206/1-301:0.0367725961,Vmn1r207/1-301:0.0390411406)0.9998500075:0.0568049374,(Vmn1r208/1-295:0.1288720127,(Vmn1r199/44-346:0.1085449077,(Vmn1r212/1-302:0.1105056615,Vmn1r222/1-301:0.1157273483)0.9998500075:0.0491708133)0.9948234594:0.0260720078)0.9861159689:0.0152082945)0.9147624691:0.0112252913)0.9998500075:0.1194970073)0.9998500075:0.0909009910)0.999850075:0.2338975167)0.9998500075:0.3331540459,(((Vmn1r19/1-299:0.0790056475,(Vmn1r18/1-299:0.0499008348,Vmn1r28/1-299:0.0387974599)0.9998500075:0.0358132081)0.9880884805:0.0421577602,((Vmn1r25/1-299:0.1548342214,(Vmn1r22/1-299:0.0400527618,Vmn1r23/1-299:0.0384558861)0.9998500075:0.0787736327)0.9998500075:0.0345308843,(((Vmn1r11/1-299:0.0606066753,((Vmn1r32/1-299:0.0237307874,(Vmn1r33/1-299:0.1072977457,(Vmn1r35/1-296:0.0229010398,Vmn1r36/1-299:0.0567386161)0.9998500075:0.0465449283)0.9945709836:0.0160712605)0.9998500075:0.050872

4234,(Vmn1r24/1-296:0.0988134537,Vmn1r26/1-  
291:0.1025322905)0.9998500075:0.0402635237)0.2317190862:0.0109891270)0.9960947766:0.008658  
1264,(Vmn1r4/1-297:0.1150980581,((Vmn1r5/1-299:0.0566198828,Vmn1r6/1-  
299:0.0405398331)0.9998500075:0.0568345666,((Vmn1r16/1-299:0.0525017181,Vmn1r29/1-  
299:0.0529851716)0.9998500075:0.0445645461,(((Vmn1r9/1-299:0.0100534087,Vmn1r10/1-  
299:0.0093490375)0.9998500075:0.0512528305,(Vmn1r7/1-299:0.0271144005,Vmn1r8/1-  
299:0.0096057010)0.9998500075:0.0582059312)0.9998500075:0.0498709355,((Vmn1r20/1-  
299:0.0108645650,Vmn1r27/1-299:0.0182640033)0.9998500075:0.0754952192,(Vmn1r17/1-  
299:0.0317444804,Vmn1r31/1-  
299:0.0564153533)0.9998500075:0.0294385974)0.9998500075:0.0330072814)0.9985512137:0.018340  
0574)0.9878142440:0.0095688850)0.9352454011:0.0087691266)0.9998500075:0.0179067680)0.99985  
00075:0.0173535768,((Vmn1r12/1-301:0.0593199466,Vmn1r14/1-  
297:0.0425493498)0.9998500075:0.0723479111,(Vmn1r13/1-299:0.1071054158,Vmn1r15/1-  
299:0.1164837751)0.9991786807:0.0205151049)0.9998500075:0.0123469683)0.9601134311:0.0095485  
499)0.9921362255:0.0615925844)0.9998500075:0.3625908712,(Vmn1r1/1-300:0.3678383857,  
(Vmn1r44/1-302:0.0525487535,((Vmn1r50/1-302:0.1146460281,Vmn1r49/1-  
302:0.0695098154)0.9851658824:0.0220138687,(Vmn1r40/1-302:0.0631465839,Vmn1r41/2-  
303:0.0864742592)0.9998500075:0.0227639927)0.9372309752:0.0220290454)0.9998500075:0.229913  
7128,(Vmn1r54/17-317:0.3399697648,((Vmn1r47/1-302:0.0327138501,Vmn1r48/1-  
296:0.0104848306)0.9998500075:0.0422733652,(Vmn1r42/17-318:0.1161568022,Vmn1r45/17-  
312:0.0380879633)0.9930590098:0.0256488191)0.9998500075:0.1776416872)0.5260260219:0.027553  
9806)0.9998500075:0.1415590550)0.9998500075:0.2543560654)0.9998500075:0.3132721980)0.91755  
07332:0.0871302627)0.1956379228:0.1105816811,((((Vmn1r77/3-305:0.1881036678,(Vmn1r79/3-  
305:0.0000000001,(Vmn1r2/3-305:0.0140531152,Vmn1r3/3-  
305:0.0084405522)0.9998500075:0.0056029435)0.9998500075:0.1184102100)0.9998500075:0.0409000  
311,((Vmn1r78/3-307:0.1668450870,(Vmn1r81/3-305:0.0986548090,Vmn1r83/3-  
305:0.0709572635)0.9998500075:0.0487574356)0.9998500075:0.0351266429,(Vmn1r75/3-  
304:0.1376997517,(Vmn1r73/1-302:0.1711654717,(Vmn1r76/21-323:0.0962515896,(Vmn1r74/1-  
303:0.1141712771,Vmn1r80/1-  
305:0.0682440751)0.7861408523:0.0094040036)0.9998500075:0.0537217150)0.8471209809:0.007096  
3456)0.7304198548:0.0173103077)0.9887959095:0.0267687629)0.9998500075:0.1739167740,  
(Vmn1r82/1-303:0.2574597774,Vmn1r84/13-  
317:0.3430922283)0.3102928016:0.0385826977)0.9998500075:0.2811986390,(((Vmn1r66/6-  
309:0.1972142934,(Vmn1r67/1-304:0.1667911127,(Vmn1r68/15-318:0.0680505990,Vmn1r69/15-  
318:0.0506099718)0.9998500075:0.1138920245)0.9607275087:0.0234218963)0.9998500075:0.0462261  
074,(Vmn1r71/1-305:0.2180246372,(Vmn1r184/5-309:0.0514135789,Vmn1r185/6-  
310:0.0427106981)0.9998500075:0.1802289652)0.9998500075:0.0669155563)0.9998500075:0.129151

7467,(Vmn1r224/1-297:0.3284587327,(Vmn1r227/1-304:0.2152222881,(Vmn1r228/31-332:0.1441618617,Vmn1r232/46-349:0.1284858568)0.9647599877:0.0408094026)0.9998500075:0.1954317056)0.8426622901:0.0425814022)0.9998500075:0.1719303244,(Vmn1r234/24-328:0.4195878651,Vmn1r237/1-289:0.2661119680)0.9998500075:0.1220304071)0.9998500075:0.1892207076)0.9803453771:0.1061173015,(Vmn1r172/1-309:0.2287917479,(((Vmn1r56/1-295:0.0467831068,(Vmn1r57/1-295:0.0355666238,(Vmn1r59/1-295:0.0413967514,(Vmn1r58/1-295:0.0275662636,((Vmn1r62/1-295:0.0122275190,Vmn1r63/1-295:0.0225556232)0.9839700885:0.0035333665,(Vmn1r60/1-295:0.0171962706,Vmn1r61/1-295:0.0538633806)0.9998500075:0.0199104368)0.9998500075:0.0152811450)0.9998500075:0.0459860270)0.8839316864:0.0094650521)0.9998500075:0.0255830208)0.9998500075:0.2199284453,(Vmn1r171/13-314:0.0077254560,(Vmn1r176/1-302:0.0706148933,Vmn1r175/1-302:0.0256745083)0.6216842301:0.0208500366)0.9998500075:0.1609578333)0.9659322286:0.0327437113,((Vmn1r90/1-307:0.0412264411,(Vmn1r168/1-307:0.0155403664,Vmn1r177/1-307:0.0125459585)0.9998500075:0.0363331391)0.9998500075:0.1896569114,(Vmn1r178/1-302:0.0974402593,((Vmn1r181/1-302:0.0549479436,Vmn1r182/1-303:0.0903009690)0.9998500075:0.0479570889,((Vmn1r102/1-309:0.0093248067,(Vmn1r93/1-309:0.0000000001,Vmn1r126/1-309:0.0109478971)0.9998500075:0.0072279871)0.9998500075:0.0689069125,(((Vmn1r105/1-305:0.0185366955,(Vmn1r129/1-305:0.0157220819,Vmn1r96/1-305:0.0150278585)0.5568981164:0.0048077150)0.9998500075:0.0193798021,((Vmn1r98/1-305:0.0055507653,Vmn1r119/1-305:0.0055424552)0.9937597198:0.0030830843,(Vmn1r92/1-305:0.0085415045,Vmn1r101/1-305:0.0250624052)0.9952198521:0.0083284881)0.9998500075:0.0109263586)0.9998500075:0.0491636294,(((Vmn1r103/1-303:0.0170667543,(Vmn1r99/1-303:0.0028814685,Vmn1r120/1-303:0.0198239279)0.9998500075:0.0228552805)0.9998500075:0.0086413154,(Vmn1r94/1-303:0.0112905387,Vmn1r127/1-303:0.0084037948)0.9654221063:0.0028062959)0.9998500075:0.0235412086,(Vmn1r123/1-305:0.0363101918,((Vmn1r106/1-304:0.0261015879,(Vmn1r97/1-304:0.0035404657,Vmn1r108/1-304:0.0076517974)0.9998500075:0.0246183523)0.9998500075:0.0216867184,((Vmn1r91/1-305:0.0171485351,Vmn1r124/1-305:0.0309646224)0.9998500075:0.0112004427,(Vmn1r109/1-295:0.0204479264,(Vmn1r100/1-305:0.0033203214,(Vmn1r125/1-305:0.0088819303,(Vmn1r128/1-305:0.0167836975,(Vmn1r95/1-305:0.0027769195,Vmn1r104/1-305:0.0111202794)0.9822272720:0.0027594872)0.9998500075:0.0162638696)0.9988490838:0.0055610804)0.9998500075:0.0050232555)0.9737422723:0.0030847422)0.9998500075:0.0185144111)0.999850075:0.0104042281)0.9806874196:0.0092107280)0.9998500075:0.0158432618)0.9998500075:0.0243311922)0.9998500075:0.0265631805)0.7313167105:0.0144399375)0.9998500075:0.1713000963)0.963435

2319:0.0398731916)0.9948001940:0.0718521388)0.9998500075:0.7961031891)0.9998500075:0.16686  
13512)0.9998500075:0.2932332395)0.9998500075:0.2100817075)0.9998500075:0.1337883240)0.9998  
500075:0.0657077723)0.9998500075:0.0642403945)0.9998500075:0.1036045789)0.9998500075:0.495  
9055916)0.9893960458:0.1660206901)0.9938415140:0.2053234115)0.9952980337:0.2476082493)0.99  
98500075:0.5838714662)0.9998500075:0.3643861020)0.9980247704:0.1718649571)0.6620329349:0.0  
661651291)0.9998500075:0.1747632360);
